# Supplementary material for: Dact genes are chordate specific regulators at the intersection of Wnt and Tgf-β signaling pathways
Source: PubMed Central journal article supplement (PMC4236578; doi:10.1186/1471-2148-14-157), 2014-08-06
Supplement: 1471-2148-14-157-S1.pdf [file 1471-2148-14-157-S1.pdf]

## Additional File 1. Bilaterians searched for *Dact* genes.

Abbreviations of species names are indicated on the left; others: o, order; so, superorder. *Dact* EST sequences are represented by a tick; for genomic sequences, the genomic localization is indicated, following the nomenclature of the 2012 edition of the Ensemble (<http://www.ensembl.org/index.html>), NCBI (<http://www.ncbi.nlm.nih.gov/>), elephant shark genome project (<http://esharkgenome.imcb.a-star.edu.sg/>) and Japanese lamprey genome project (<http://jlampreygenome.imcb.a-star.edu.sg/>) databases. For the Anole lizard, *Xenopus tropicalis*, the coelacanth, and the sea lamprey, in addition the nomenclature used in the 2008 edition of Ensemble is shown.

| Deuterostomes                                                           |              |                                 |                             |                                               |                                                  |                                            |               |                                                  |                                                                 |
|-------------------------------------------------------------------------|--------------|---------------------------------|-----------------------------|-----------------------------------------------|--------------------------------------------------|--------------------------------------------|---------------|--------------------------------------------------|-----------------------------------------------------------------|
|                                                                         | abbreviation | species                         | common name                 | <i>Dact1</i>                                  | <i>Dact2</i>                                     | <i>Dact3</i> or <i>dact3a</i>              | <i>dact3b</i> | <i>Dact4</i>                                     | comments                                                        |
| classification                                                          |              |                                 |                             |                                               |                                                  |                                            |               |                                                  |                                                                 |
| Phylum: Chordata                                                        |              |                                 |                             |                                               |                                                  |                                            |               |                                                  |                                                                 |
| Subphylum: Vertebrata                                                   |              |                                 |                             |                                               |                                                  |                                            |               |                                                  |                                                                 |
| Infraphylum: Gnathostomata                                              |              |                                 |                             |                                               |                                                  |                                            |               |                                                  |                                                                 |
| Superclass: Osteichthyes                                                |              |                                 |                             |                                               |                                                  |                                            |               |                                                  |                                                                 |
| Class: Sarcopterygii                                                    |              |                                 |                             |                                               |                                                  |                                            |               |                                                  |                                                                 |
| Subclass: Tetrapodomorpha                                               |              |                                 |                             |                                               |                                                  |                                            |               |                                                  |                                                                 |
| Amniota; Synapsids -<br>Infraclass: Mammals;<br>Placentalia             | Hs           | <i>Homo sapiens</i>             | human                       | chr14✓                                        | chr6✓                                            | chr19✓                                     |               | (locus chr11)                                    | <i>Dact4</i> locus is identifiable but lacks a <i>Dact</i> gene |
|                                                                         | Mm           | <i>Mus musculus</i>             | mouse                       | chr12✓                                        | chr17✓                                           | chr7✓                                      |               | (locus chr19)                                    |                                                                 |
|                                                                         | Bt           | <i>Bos Taurus</i>               | cattle                      | chr10                                         | chr9                                             | chr18                                      |               | (locus chr29)                                    |                                                                 |
|                                                                         | Cf           | <i>Canis familiaris</i>         | dog                         | chr8                                          | chr1                                             | chr1                                       |               | (locus chr18)                                    |                                                                 |
|                                                                         | La           | <i>Loxodonta africana</i>       | African elephant            | s2755                                         |                                                  | s4446                                      |               |                                                  |                                                                 |
| Infraclass: Mammals;<br>Marsupials                                      | Md           | <i>Monodelphis domestica</i>    | opossum                     | chr1                                          | chr2                                             | chr4                                       |               | (locus chr5)                                     |                                                                 |
| Infraclass: Mammals;<br>Monotremes                                      | Oa           | <i>Ornithorhynchus anatinus</i> | platypus                    | c214, 26117;<br>c164635<br>(ex4)              | c20694,<br>c22096                                | c69853 (ex1),<br>c289003 (ex4)             |               |                                                  |                                                                 |
| Amniota; Diapsids;<br>Archosauromorpha;<br>Infraclass: Aves             | Gg           | <i>Gallus gallus</i>            | chicken                     | chr5✓                                         | chr3✓                                            |                                            |               |                                                  | <i>Dact3</i> and 4 loci not conserved                           |
|                                                                         | Mg           | <i>Meleagris gallopavo</i>      | turkey                      | chr5                                          | chr2                                             |                                            |               |                                                  |                                                                 |
|                                                                         | Tg           | <i>Taeniopygia guttata</i>      | zebrafinch                  | chr5                                          | chr3                                             |                                            |               |                                                  |                                                                 |
|                                                                         | Ap           | <i>Anas platyrhynchos</i>       | duck                        | s626                                          | s530                                             |                                            |               |                                                  |                                                                 |
|                                                                         | Mu           | <i>Melopsittacus undulatus</i>  | budgerigar                  | JH556483                                      | JH556595                                         |                                            |               |                                                  |                                                                 |
| Amniota; Diapsids;<br>Infraclass:<br>Lepidosauromorpha                  | Ac           | <i>Anolis carolinensis</i>      | Anole lizard                | GL343459<br>(formerly s5,<br>s29) and<br>chr2 | chr1<br>(formerly<br>s549)                       | GL343568<br>(formerly s1268)               |               | GL343928<br>(formerly s71,<br>s1206)             |                                                                 |
|                                                                         | Pym          | <i>Python molurus</i>           | Burmese python              | c26513843<br>c26939700                        | c24659227<br>c26563497<br>c26659464<br>c26922077 | c26582260                                  |               | c26563039<br>c26110406<br>c25444438<br>c24942884 |                                                                 |
| Amniota; Anapsids;<br>Infraclass: Testudines<br>(turtles and tortoises) | Cpb          | <i>Chrysemys picta bellii</i>   | Western painted turtle      | JH584658                                      | JH584758                                         | JH584472                                   |               | JH584543                                         |                                                                 |
|                                                                         | Ps           | <i>Pelodiscus sinensis</i>      | Chinese soft shield turtle  | JH212506                                      | JH208515                                         | JH209944                                   |               | JH206113                                         |                                                                 |
| Infraclass: Amphibia;<br>Anura                                          | Xt           | <i>Xenopus tropicalis</i>       | Western clawed frog         | GL172704<br>(formerly<br>s68)<br>✓            | (locus<br>GL172638)                              | GL172667<br>(formerly s31) ✓               |               | (locus<br>GL173034,<br>formerly s398)            | Remnants of <i>Dact2</i> and 4 loci identifiable                |
|                                                                         | Xl           | <i>Xenopus laevis</i>           | African clawed frog         | 1-a, 1-b ✓                                    |                                                  | 3-a, 3-b ✓                                 |               |                                                  |                                                                 |
|                                                                         | Rc           | <i>Rana catesbeiana</i>         |                             | ✓                                             |                                                  |                                            |               |                                                  |                                                                 |
| Subclass: Dipnoi<br>(lungfishes)                                        | Pa           | <i>Protopterus aethiopicus</i>  | African or marbled lungfish |                                               | ✓                                                |                                            |               |                                                  |                                                                 |
| Subclass:<br>Coelacanthimorpha                                          | Lc           | <i>Latimeria chalumnae</i>      | Coelacanth                  | JH126564<br>(formerly<br>c002619-17)          | JH129292<br>(formerly<br>c230613-<br>11)         | JH128225<br>(formerly<br>c190000,13,18,22) |               | JH126593<br>(formerly<br>c015702)                |                                                                 |
| Class: Actinopterygii<br>Subclass: Neopterygii                          |              |                                 |                             |                                               |                                                  |                                            |               |                                                  |                                                                 |
| Infraclass: Holostei (bowfins,<br>gars)                                 | Lo           | <i>Lepisosteus oculatus</i>     | Spotted gar                 | LG7                                           | LG16                                             | LG2                                        |               | LG28                                             | Intronless <i>dact4r</i> on LG14                                |
| Infraclass: Teleostei                                                   |              |                                 |                             |                                               |                                                  |                                            |               |                                                  |                                                                 |
| o: Cypriniformes                                                        | Dr           | <i>Danio rerio</i>              | zebrafish                   | chr17✓                                        | chr13✓                                           | chr18✓                                     | chr10✓        | chr14✓                                           | Intronless <i>dact4r</i> on chr24 ✓                             |
|                                                                         | Pp           | <i>Pimephales promelas</i>      | Fathead minnow              | ✓                                             |                                                  | ✓                                          |               | ✓                                                |                                                                 |
| o: Siluriformes                                                         | Ip           | <i>Ictalurus punctatus</i>      | Channel catfish             | ✓                                             |                                                  |                                            |               |                                                  |                                                                 |

|                                               |     |                                      |                                                                                                                 |                                                                                                                                                                         |                               |                 |                  |                                    |                                                        |
|-----------------------------------------------|-----|--------------------------------------|-----------------------------------------------------------------------------------------------------------------|-------------------------------------------------------------------------------------------------------------------------------------------------------------------------|-------------------------------|-----------------|------------------|------------------------------------|--------------------------------------------------------|
| <b>so: Protacanthopterygii</b>                |     |                                      |                                                                                                                 |                                                                                                                                                                         |                               |                 |                  |                                    |                                                        |
| o: Salmoniformes                              | Ssa | <i>Salmo salar</i>                   | Atlantic salmon                                                                                                 | ✓                                                                                                                                                                       |                               |                 |                  |                                    |                                                        |
|                                               | Ot  | <i>Oncorhynchus tshawytscha</i>      | Chinook salmon                                                                                                  |                                                                                                                                                                         |                               |                 |                  | ✓                                  |                                                        |
|                                               | Omy | <i>Oncorhynchus mykiss</i>           | Rainbow trout                                                                                                   | ✓                                                                                                                                                                       |                               |                 | ✓                |                                    |                                                        |
| o: Osmeriformes                               | Omo | <i>Osmerus mordax</i>                | Rainbow smelt                                                                                                   |                                                                                                                                                                         | ✓                             |                 |                  |                                    |                                                        |
| <b>so: Paracanthopterygii</b>                 |     |                                      |                                                                                                                 |                                                                                                                                                                         |                               |                 |                  |                                    |                                                        |
| o: Gadiformes=Anacanthini                     | Gmo | <i>Gadus morhua</i>                  | Atlantic cod                                                                                                    | s909/c572298, c143687,                                                                                                                                                  | s609/c360826                  | s3150           | s4368            | s3610; partial sequences on c76676 |                                                        |
| <b>so: Acanthopterygii</b>                    |     |                                      |                                                                                                                 |                                                                                                                                                                         |                               |                 |                  |                                    |                                                        |
| o: Tetraodontiformes                          | Tr  | <i>Takifugu rubripes</i>             | Fugu                                                                                                            | (locus on s136)                                                                                                                                                         | s53                           | s165            | s455             | c187                               | <i>dact1</i> locus present, but no <i>dact1</i> gene   |
|                                               | Tn  | <i>Tetraodon nigroviridis</i>        | Green spotted pufferfish                                                                                        | (locus on s7089)                                                                                                                                                        | chr17                         | chrUn/s14702    | chr7             | chr1                               |                                                        |
| o: Gasterosteiformes                          | Ga  | <i>Gasterosteus aculeatus</i>        | three-spined stickleback                                                                                        | grXV✓                                                                                                                                                                   | grVI                          | grI✓            | (locus on grVII) | grIV✓                              | Sequence gap at the position of the <i>dact3b</i> gene |
| o: Beloniformes                               | OI  | <i>Oryzias latipes</i>               | Medaka                                                                                                          | chr22✓                                                                                                                                                                  | chr15✓                        | chr13           | chr14✓           | chr10✓                             |                                                        |
| o: Perciformes                                | Pf  | <i>Perca flavescens</i>              | Yellow perch                                                                                                    |                                                                                                                                                                         |                               |                 |                  | ✓                                  |                                                        |
|                                               | DI  | <i>Dicentrarchus labrax</i>          | European seabass                                                                                                |                                                                                                                                                                         |                               |                 |                  | ✓                                  |                                                        |
|                                               | On  | <i>Oreochromis niloticus</i>         | Nile Tilapia                                                                                                    | GL831368                                                                                                                                                                | GL831145                      | GL831147        | GL831515         | GL831165                           |                                                        |
|                                               | Hb  | <i>Haplochromis burtoni</i>          | African cichlid                                                                                                 |                                                                                                                                                                         |                               |                 | ✓                |                                    |                                                        |
|                                               | Sau | <i>Sparus aurata</i>                 | Gilthead seabream                                                                                               |                                                                                                                                                                         |                               |                 |                  | ✓                                  |                                                        |
| o: Cyprinodontiformes                         | Xm  | <i>Xiphophorus maculatus</i>         | Southern platyfish                                                                                              | JH557083                                                                                                                                                                | JH556663                      | JH556880        |                  | AGAJO1047724 & JH556834            |                                                        |
| <b>Superclass Chondrichthyes</b>              |     |                                      |                                                                                                                 |                                                                                                                                                                         |                               |                 |                  |                                    |                                                        |
| <b>Subclass: Elasmobranchii:</b>              |     |                                      |                                                                                                                 |                                                                                                                                                                         |                               |                 |                  |                                    |                                                        |
| Subdivision Selachii; <b>so: Squalomorphi</b> | Sac | <i>Squalus acanthias</i>             | Spiny dogfish shark                                                                                             | ✓                                                                                                                                                                       |                               |                 |                  |                                    |                                                        |
| Subdivision / <b>so: Batoidea</b>             | Tc  | <i>Torpedo californica</i>           | Pacific electric ray                                                                                            |                                                                                                                                                                         | ✓                             |                 |                  | ✓                                  |                                                        |
|                                               | Le  | <i>Leucoraja erinacea</i>            | Little skate<br><a href="http://www.marinegenomics.org/node/27111">http://www.marinegenomics.org/node/27111</a> |                                                                                                                                                                         |                               |                 |                  | ✓                                  |                                                        |
| <b>Subclass: Holocephali;</b>                 |     |                                      |                                                                                                                 |                                                                                                                                                                         |                               |                 |                  |                                    |                                                        |
| o: Chimaeriformes                             | Cm  | <i>Callorhynchus milii</i>           | Elephant shark                                                                                                  | AAVX 014209261.1<br>01221604.1<br>01236760.1<br>01179725.1<br>01276763.1                                                                                                | AAVX 01057442.1<br>01184388.1 | AAVX 01159308.1 |                  | AAVX 01316550.1                    |                                                        |
| <b>Infraphylum: Agnatha</b>                   |     |                                      |                                                                                                                 |                                                                                                                                                                         |                               |                 |                  |                                    |                                                        |
| <b>Superclass: Cyclostomata</b>               |     |                                      |                                                                                                                 |                                                                                                                                                                         |                               |                 |                  |                                    |                                                        |
| <b>Class Hyperoartia/Petromyzontida</b>       | Pm  | <i>Petromyzon marinus</i>            | Sea lamprey                                                                                                     | dactA (exons 3+4, GL476511/c36439); dactB (exons 3+4, c37220 and c20195); dactD (exon 4, c54804)                                                                        |                               |                 |                  |                                    | At least 3 genes                                       |
|                                               | Lj  | <i>Lenthenteron japonicum</i>        | Japanese lamprey                                                                                                | dactA (KE993709); dactB (KE993739); dactC (exons 2-4, KE993726; similar exon 4 on KE999188/KE99520); dactD (exon 4, KE994909); orphan exon 1: APJL01152884/APJL01160608 |                               |                 |                  |                                    | At least 4 genes                                       |
| <b>Phylum: Chordata</b>                       |     |                                      |                                                                                                                 |                                                                                                                                                                         |                               |                 |                  |                                    |                                                        |
| <b>Subphylum: Tunicata/Urochordata</b>        |     |                                      |                                                                                                                 |                                                                                                                                                                         |                               |                 |                  |                                    |                                                        |
| <b>Class: Appendicularia</b>                  | Oik | <i>Oikopleura dioica</i>             |                                                                                                                 |                                                                                                                                                                         |                               |                 |                  |                                    | No significant hit                                     |
| <b>Class: Ascidiacea</b>                      | Cii | <i>Ciona intestinalis</i>            | Vase tunicate                                                                                                   |                                                                                                                                                                         |                               |                 |                  |                                    |                                                        |
|                                               | Cis | <i>Ciona savignyi</i>                |                                                                                                                 |                                                                                                                                                                         |                               |                 |                  |                                    |                                                        |
| <b>Phylum: Chordata</b>                       |     |                                      |                                                                                                                 |                                                                                                                                                                         |                               |                 |                  |                                    |                                                        |
| <b>Subphylum: Cephalochordata</b>             |     |                                      |                                                                                                                 |                                                                                                                                                                         |                               |                 |                  |                                    |                                                        |
| <b>Class Leptocardii</b>                      | Bfl | <i>Branchiostoma floridae</i>        | Florida lancelet                                                                                                |                                                                                                                                                                         |                               | s65 ✓           |                  |                                    |                                                        |
| <b>Phylum: Hemichordata</b>                   |     |                                      |                                                                                                                 |                                                                                                                                                                         |                               |                 |                  |                                    |                                                        |
| <b>Class: Enteropneusta</b>                   | Sak | <i>Saccoglossus kowalevskii</i>      | Acorn worm                                                                                                      |                                                                                                                                                                         |                               |                 |                  |                                    | No significant hit                                     |
| <b>Phylum: Echinodermata</b>                  |     |                                      |                                                                                                                 |                                                                                                                                                                         |                               |                 |                  |                                    |                                                        |
| <b>Class: Echinoidea</b>                      | Spu | <i>Strongylocentrotus purpuratus</i> | California purple sea urchin                                                                                    |                                                                                                                                                                         |                               |                 |                  |                                    | No significant hit                                     |

#### Protostomes - lophotrochozoa

|                          |     |                            |                                            |  |  |  |  |  |                    |
|--------------------------|-----|----------------------------|--------------------------------------------|--|--|--|--|--|--------------------|
| <b>Phylum: Mollusca</b>  | Apc | <i>Aplysia californica</i> | California sea slug or California sea hare |  |  |  |  |  | No significant hit |
| <b>Class: Gastropoda</b> |     |                            |                                            |  |  |  |  |  |                    |

#### Protostomes - ecdysozoa

|                           |     |                                |                       |  |  |  |  |  |                    |
|---------------------------|-----|--------------------------------|-----------------------|--|--|--|--|--|--------------------|
| <b>Phylum: Arthropoda</b> | Drm | <i>Drosophila melanogaster</i> | Fruit fly             |  |  |  |  |  | No significant hit |
| <b>Class: Insecta</b>     | Trc | <i>Tribolium castaneum</i>     | Red flour beetle      |  |  |  |  |  |                    |
|                           | Bom | <i>Bombyx mori</i>             | domesticated silkworm |  |  |  |  |  |                    |

|                  |     |                   |                  |  |  |  |  |  |                    |
|------------------|-----|-------------------|------------------|--|--|--|--|--|--------------------|
| Phylum: Nematoda | Cel | <i>C.elegans</i>  |                  |  |  |  |  |  | No significant hit |
|                  | Cbr | <i>C.briggsae</i> |                  |  |  |  |  |  |                    |
|                  | Loa | <i>Loa loa</i>    | African eye worm |  |  |  |  |  |                    |
