# Supplementary material for: Dact genes are chordate specific regulators at the intersection of Wnt and Tgf-β signaling pathways
Source: PubMed Central journal article supplement (PMC4236578; doi:10.1186/1471-2148-14-157), 2014-08-06
Supplement: 1471-2148-14-157-S2.pdf [file 1471-2148-14-157-S2.pdf]

## Additional File 2. Accession information for the *Dact* genes

### Dact1

| Species                         | Sequence sources (location, ENSEMBL ID, Genbank ID)                                    |
|---------------------------------|----------------------------------------------------------------------------------------|
| <i>Homo sapiens</i>             | chr14 ENSP00000337439                                                                  |
| <i>Mus musculus</i>             | chr12 ENSMUSP00000117169, NP_001177395                                                 |
| <i>Bos Taurus</i>               | chr10 ENSBTAP00000025871                                                               |
| <i>Canis familiaris</i>         | chr8 ENSCAFP00000022721                                                                |
| <i>Loxodonta africana</i>       | super contig 2755, scaffold 9 ENSLAFP00000006293                                       |
| <i>Monodelphis domestica</i>    | chr1 ENSMODP00000010125                                                                |
| <i>Ornithorhynchus anatinus</i> | Exons 2-4: super contig 214 ENSOANP00000026117, super contig 164635 ENSOANP00000012266 |
| <i>Gallus gallus</i>            | chr5 ENSGALP00000019594, NP_001038157                                                  |
| <i>Melleagris gallopavo</i>     | Exons 2-4: chr5 ENSMGAP00000014386                                                     |
| <i>Taeniopygia guttata</i>      | chr5 ENSTGUP00000013409, XP_002200415                                                  |
| <i>Anas platyrhynchos</i>       | Exons 2-4: super contig 626 ENSAPLP00000006988                                         |
| <i>Melopsittacus undulatus</i>  | JH556483                                                                               |
| <i>Anolis carolinensis</i>      | GL343459, scaffold 5, scaffold 29, chr2 ENSACAP00000014546, XP_003227188               |
| <i>Python molurus</i>           | Exons2-3: contig 26513843, contig 26939700                                             |
| <i>Chrysemys picta bellii</i>   | JH584658.1                                                                             |
| <i>Pelodiscus sinensis</i>      | Exons2-4: JH212506.1 ENSPSIP00000000543                                                |
| <i>Xenopus laevis</i>           | 1a Q8JJ48<br>1b Q8QG92                                                                 |
| <i>Xenopus tropicalis</i>       | Scaffold 68 ENSXETP00000026164                                                         |
| <i>Rana catesbeiana</i>         | Exon 4: EST GO472221                                                                   |
| <i>Latimeria chalumnae</i>      | contig 002619, contig 002618, contig 002617, JH126564 ENSLACP00000021405               |
| <i>Lepisosteus oculatus</i>     | LG7                                                                                    |
| <i>Danio rerio</i>              | chr17 ENSDARP00000058000, NP_999896                                                    |
| <i>Pimephales promelas</i>      | EST DT209342.1, DT203450.1                                                             |
| <i>Ictalurus punctatus</i>      | Exon 4 (partial): EST FD292185.1                                                       |
| <i>Salmo salar</i>              | EST DW568517, DY733227, DY706739, DW582161                                             |
| <i>Oncorhynchus mykiss</i>      | Exon1: EST CX026758, Exons 2-4: EST CX028139, CX036471, CX036458                       |
| <i>Gadus morhua</i>             | Exon2: contig 572298/contig 143687, Exon4: scaffold 909                                |
| <i>Gasterosteus aculeatus</i>   | grXV genomic, EST DW609376                                                             |
| <i>Oryzias latipes</i>          | Exons 2-4: chr22 ENSORLP00000012735, EST AM331483                                      |
| <i>Oreochromis niloticus</i>    | GL831368 ENSONIP00000014775, probably wrong splices                                    |
| <i>Xiphophorus maculatus</i>    | Exons 2-4: JH557083 ENSXMAP00000004931 (ex3-4 no intron)                               |
| <i>Squalus acanthias</i>        | Exon 4: EST EB688325.1                                                                 |
| <i>Callorhynchus milii</i>      | Exon 2: AAVX01221604, Exon 3: AAVX01236760, Exon 4: AAVX01179725, AAVX01276763         |

### Dact2

| Species                         | Sequence sources (location, ENSEMBL ID, Genbank ID)                          |
|---------------------------------|------------------------------------------------------------------------------|
| <i>Homo sapiens</i>             | chr6 ENSP00000355760                                                         |
| <i>Mus musculus</i>             | chr17 ENSMUSP00000051638 NP766414                                            |
| <i>Bos Taurus</i>               | Exons 2-4: chr9 ENSBTAP00000042173                                           |
| <i>Canis familiaris</i>         | chr1 ENSCAFP00000001234 & genomic                                            |
| <i>Monodelphis domestica</i>    | chr2 ENSMODP00000029202, XP001381611.1                                       |
| <i>Ornithorhynchus anatinus</i> | super contig 20694, super contig 22096 ENSOANP00000022342, XP001512031       |
| <i>Gallus gallus</i>            | chr3 ENSGALP00000018395                                                      |
| <i>Meleagris gallopavo</i>      | Exons 2-4: chr2 ENSMGAP00000012895                                           |
| <i>Taeniopygia guttata</i>      | chr3 ENSTGUP00000009966; XP_002189614                                        |
| <i>Anas platyrhynchos</i>       | Exons2-4: scaffold 530, KB742905 ENSAPLP00000016017                          |
| <i>Melopsittacus undulatus</i>  | JH556595                                                                     |
| <i>Anolis carolinensis</i>      | scaffold 549, contig 30595, chr1 ENSACAP00000008321, XP_003215934            |
| <i>Python molurus</i>           | Exons2-4: contig 24659227, contig 26563497, contig 26659464, contig 26922077 |
| <i>Chrysemys picta bellii</i>   | JH584758                                                                     |
| <i>Pelodiscus sinensis</i>      | JH208515 ENSPSIP00000007465                                                  |

|                                |                                                                          |
|--------------------------------|--------------------------------------------------------------------------|
| <i>Protopterus aethiopicus</i> | Exons 1-3: cDNA FL669463                                                 |
| <i>Latimeria chalumnae</i>     | contig 230613, contig 230612, contig 230611, JH129292 ENSLACP00000006683 |
| <i>Lepisosteus oculatus</i>    | LG16                                                                     |
| <i>Danio rerio</i>             | chr13 ENSDARP00000078756, NP_001071262                                   |
| <i>Osmerus mordax</i>          | Exons 1-3: EST EL546145                                                  |
| <i>Gadus morhua</i>            | scaffold 609 ENSGMOP00000017472, contig 360826                           |
| <i>Takifugu rubripes</i>       | scaffold 53 ENSTRUP00000045386, SINFRUP000000135666                      |
| <i>Tetraodon nigroviridis</i>  | chr17 ENSTNIP00000016084                                                 |
| <i>Gasterosteus aculeatus</i>  | groupVI ENSGACP00000004724                                               |
| <i>Oryzias latipes</i>         | chr15, cDNA DK099130, cDNA DK090936                                      |
| <i>Oreochromis niloticus</i>   | GL831145 ENSONIP00000012881                                              |
| <i>Xiphophorus maculatus</i>   | JH556663 ENSXMAP00000008211                                              |
| <i>Torpedo californica</i>     | Exons3-4: EST EW689921                                                   |
| <i>Callorhinchus milii</i>     | Exon 2: AAVX01057442, Exon 4: AAVX01184388, AAVX01179725                 |

### Dact3

| Species                         | Sequence sources (location, ENSEMBL ID, Genbank ID)                                     |
|---------------------------------|-----------------------------------------------------------------------------------------|
| <i>Homo sapiens</i>             | chr19 ENSP00000375783                                                                   |
| <i>Mus musculus</i>             | chr7 ENSMUSP00000104133, XP_990410                                                      |
| <i>Bos Taurus</i>               | chr18 ENSBTAP00000051010                                                                |
| <i>Loxodonta africana</i>       | s4446 ENSLAFP00000016003                                                                |
| <i>Monodelphis domestica</i>    | Exons2-4: chr4 XP_001373542                                                             |
| <i>Ornithorhynchus anatinus</i> | contig 69853 ENSOANP00000031882, contig 289003, XP_001505988                            |
| <i>Anolis carolinensis</i>      | Exons2-4: AAWZ02039310 ENSACAP00000018986, S1268                                        |
| <i>Python molurus</i>           | Exons2-4: contig 26582260                                                               |
| <i>Chrysemys picta bellii</i>   | JH584472.1                                                                              |
| <i>Pelodiscus sinensis</i>      | (ex4) JH209944.1                                                                        |
| <i>Xenopus laevis</i>           | s110<br>s13803                                                                          |
| <i>Xenopus tropicalis</i>       | s31, GL172662 ENSXETESTP00000009226, ESTs CX826750, BU911207                            |
| <i>Latimeria chalumnae</i>      | contig 190000, contig 190013, contig 190018, contig 190022, JH128225 ENSLACP00000010772 |
| <i>Lepisosteus oculatus</i>     | LG2                                                                                     |
| <i>Callorhinchus milii</i>      | ex4 AAVX01159308.1 rev compl                                                            |

### Dact3a

|                               |                                                                |
|-------------------------------|----------------------------------------------------------------|
| <i>Danio rerio</i>            | chr18 ENSDARP00000105187, XP_001340996, EST BM096490, EB953635 |
| <i>Pimephales promelas</i>    | EST DT126141, DT173940.1                                       |
| <i>Gadus morhua</i>           | Exons 2-4: scaffold 3150 ENSGMOP00000014338                    |
| <i>Takifugu rubripes</i>      | scaffold 165 SINFRUP000000177769                               |
| <i>Tetraodon nigroviridis</i> | scaffold 14702 chr16 GSTENT00022091001 CAG02860 N term trimmed |
| <i>Gasterosteus aculeatus</i> | groupI ENSGACP00000008819, EST DN705293, DT983310              |
| <i>Oryzias latipes</i>        | chr13 UTOLAPRE05100114910, EST DK202428, AM343964, DC260713    |
| <i>Oreochromis niloticus</i>  | GL831147                                                       |
| <i>Xiphophorus maculatus</i>  | JH556880 ENSXMAP00000000994                                    |

### Dact3b

|                               |                                                          |
|-------------------------------|----------------------------------------------------------|
| <i>Danio rerio</i>            | chr10 ENSDARP00000108748, XP_001345794                   |
| <i>Oncorhynchus mykiss</i>    | 3a or b, Exon 4: EST CX260816<br>3b, Exons 2,4: BX299645 |
| <i>Gadus morhua</i>           | Exons 1,4: s4368                                         |
| <i>Takifugu rubripes</i>      | Exons 1,2,4: scaffold 455                                |
| <i>Tetraodon nigroviridis</i> | chr7                                                     |
| <i>Oryzias latipes</i>        | chr14, EST AM364417                                      |
| <i>Haplochromis burtani</i>   | EST DY626400                                             |
| <i>Oreochromis niloticus</i>  | Exons 1,4: GL831515, EST GR625261                        |

### Dact4

| Species                       | Sequence sources (location, ENSEMBL ID, Genbank ID)                          |
|-------------------------------|------------------------------------------------------------------------------|
| <i>Anolis carolinensis</i>    | GL343928/s1206 ENSACAP00000023296, contig 40816                              |
| <i>Python molurus</i>         | Exons2-4: contig 26563039, contig 26110406, contig 25444438, contig 24942884 |
| <i>Chrysemys picta bellii</i> | JH584543                                                                     |
| <i>Pelodiscus sinensis</i>    | JH206113 start exon 4 probably wrong                                         |

|                                 |                                                    |
|---------------------------------|----------------------------------------------------|
| <i>Latimeria chalumnae</i>      | contig 015702                                      |
| <i>Lepisosteus oculatus</i>     | Exons 2-4: LG28                                    |
| <i>Danio rerio</i>              | chr14 ENSDARP00000107587 and ESTs                  |
| <i>Pimephales promelas</i>      | EST DT209032, DT154900, DT207848                   |
| <i>Oncorhynchus tshawytscha</i> | EST EL555352                                       |
| <i>Gadus morhua</i>             | scaffold 3610 contig76676                          |
| <i>Takifugu rubripes</i>        | scaffold 187                                       |
| <i>Tetraodon nigroviridis</i>   | chr1                                               |
| <i>Gasterosteus aculeatus</i>   | groupIV, EST DN714255, DT994919                    |
| <i>Oryzias latipes</i>          | chr10 UTOLAPRE05100112289, EST BJ526132            |
| <i>Perca flavescens</i>         | EST GO571064                                       |
| <i>Dicentrarchus labrax</i>     | EST FM009490                                       |
| <i>Oreochromis niloticus</i>    | GL831165                                           |
| <i>Sparus aurata</i>            | AM955614                                           |
| <i>Xiphophorus maculatus</i>    | Exon 1: scaffold AGAJ01047724, Exons 2-4: JH556834 |
| <i>Torpedo californica</i>      | EST EW689921                                       |
| <i>Leucoraja erinacea</i>       | EST CO049720                                       |
| <i>Callorhynchus milii</i>      | Exon 4: AAVX01316550.1                             |
| <b>Dact4r</b>                   |                                                    |
| <i>Lepisosteus oculatus</i>     | LG14, no introns                                   |
| <i>Danio rerio</i>              | chr24, EST DV594105                                |

### **Agnathan Dacts**

| Species                       | Sequence sources (location, ENSEMBL ID, Genbank ID)                                                                                                                                     |
|-------------------------------|-----------------------------------------------------------------------------------------------------------------------------------------------------------------------------------------|
| <i>Petromyzon marinus</i>     | dactA Exons 3+4: contig 36439=GL476511<br>dactB Exons 3-4: super contig 37220, contig 20195<br>dactD Exon 4: contig 54804<br>Further sequences: contig 2706, contig 46758, contig 19740 |
| <i>Lethenteron japonicum</i>  | dactA: KE993709<br>dactB: KE993739<br>dactC Exons 2-4: KE993726 (similar exon 4 sequences on KE999188/KE99520)<br>dactD Exon 4: KE994909<br>orphan Exon 1: APJL01152884/APJL01160608    |
| <i>Branchiostoma floridae</i> | cDNA_XP_002606360, EST BW773332                                                                                                                                                         |
