# Supplementary material for: Dact genes are chordate specific regulators at the intersection of Wnt and Tgf-β signaling pathways
Source: PubMed Central journal article supplement (PMC4236578; doi:10.1186/1471-2148-14-157), 2014-08-06
Supplement: 1471-2148-14-157-S3.pdf [file 1471-2148-14-157-S3.pdf]

### **Additional File 3. Alignment of cyclostome and *Branchiostoma* dact proteins.**

Gapped alignment of cyclostome and lancelet dact sequences with the dact sequences from the coelacanth and the spotted gar.
