# Supplementary material for: Dact genes are chordate specific regulators at the intersection of Wnt and Tgf-β signaling pathways
Source: PubMed Central journal article supplement (PMC4236578; doi:10.1186/1471-2148-14-157), 2014-08-06

# Additional File 6. Extended synteny analysis of gnathostome *Dact* gene loci.

Wider environment of gnathostome *Dact* loci, using the same shape and color codes as in Figure 3. Note the extended similarity of genomic loci for the individual *Dact* orthologs.

## A. *Dact1* loci

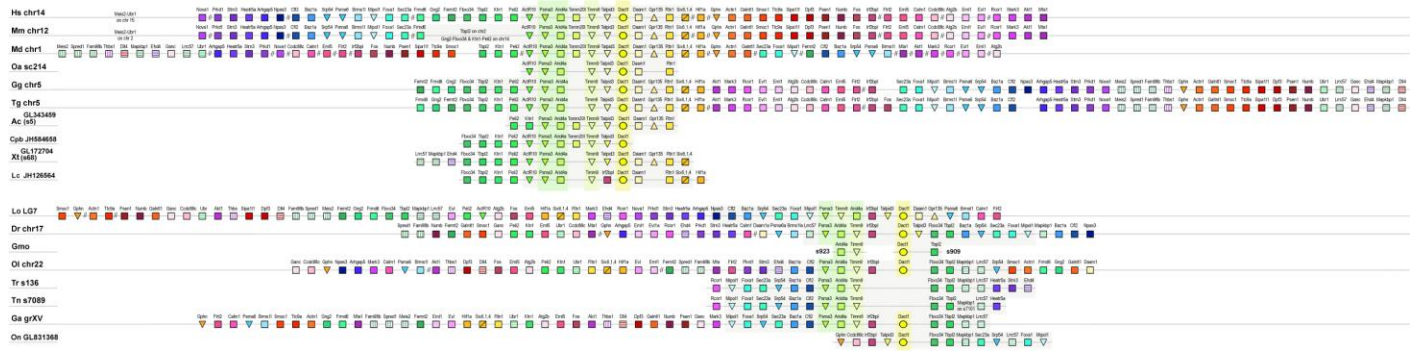

## B. *Dact2* loci

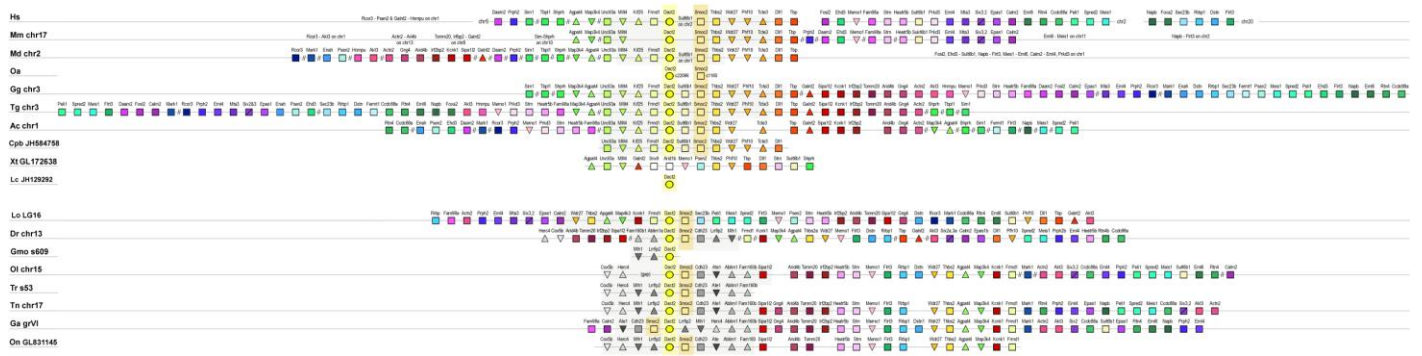

## C. *Dact3* loci

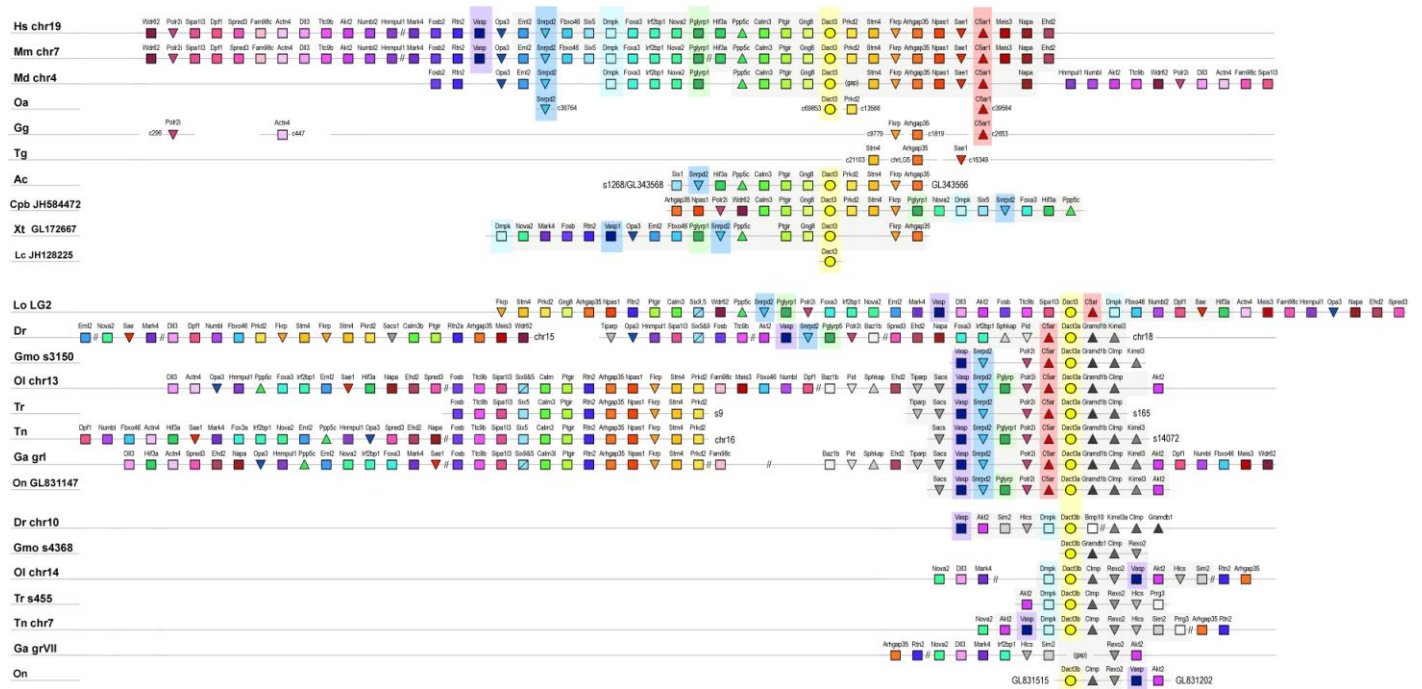

# D. Dact4 loci

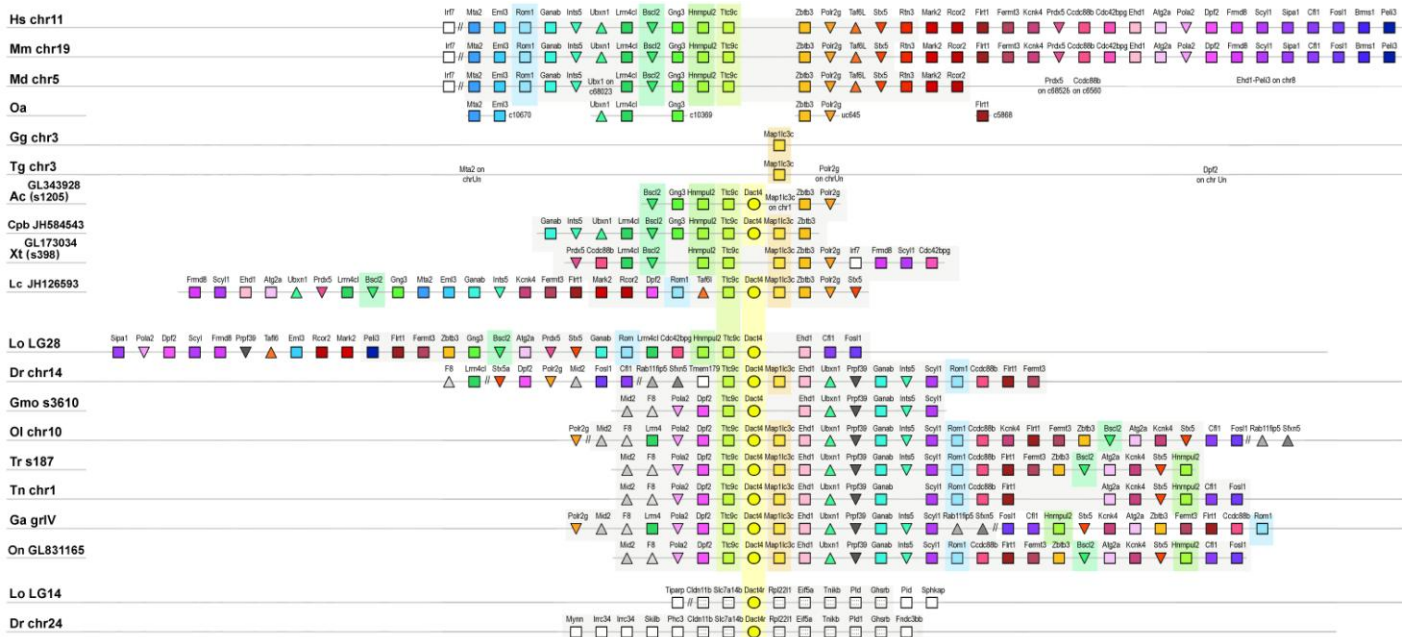

Supplement: 1471-2148-14-157-S6.pdf [file 1471-2148-14-157-S6.pdf]
