# Supplementary material for: Dact genes are chordate specific regulators at the intersection of Wnt and Tgf-β signaling pathways
Source: PubMed Central journal article supplement (PMC4236578; doi:10.1186/1471-2148-14-157), 2014-08-06

## **Additional File 7. Phylogenetic protein trees for genes associated with all four *Dact* loci.**

The color code used in the trees and abbreviations are as in Figure 2. Note that wherever statistically well supported metagroups appeared in these trees, they encompassed *Dact1,3* and/or *Dact2,4* associated genes; all other permutations (linking *Dact1,2*; *Dact1,4*; *Dact3,2* or *Dact3,4* associated genes) did not occur. This supports the idea that *Dact1* and *Dact3* loci arose from one, *Dact2* and *Dact4* loci from the second locus generated during the 1<sup>st</sup> round of vertebrate genome duplication.

# A. Ehd

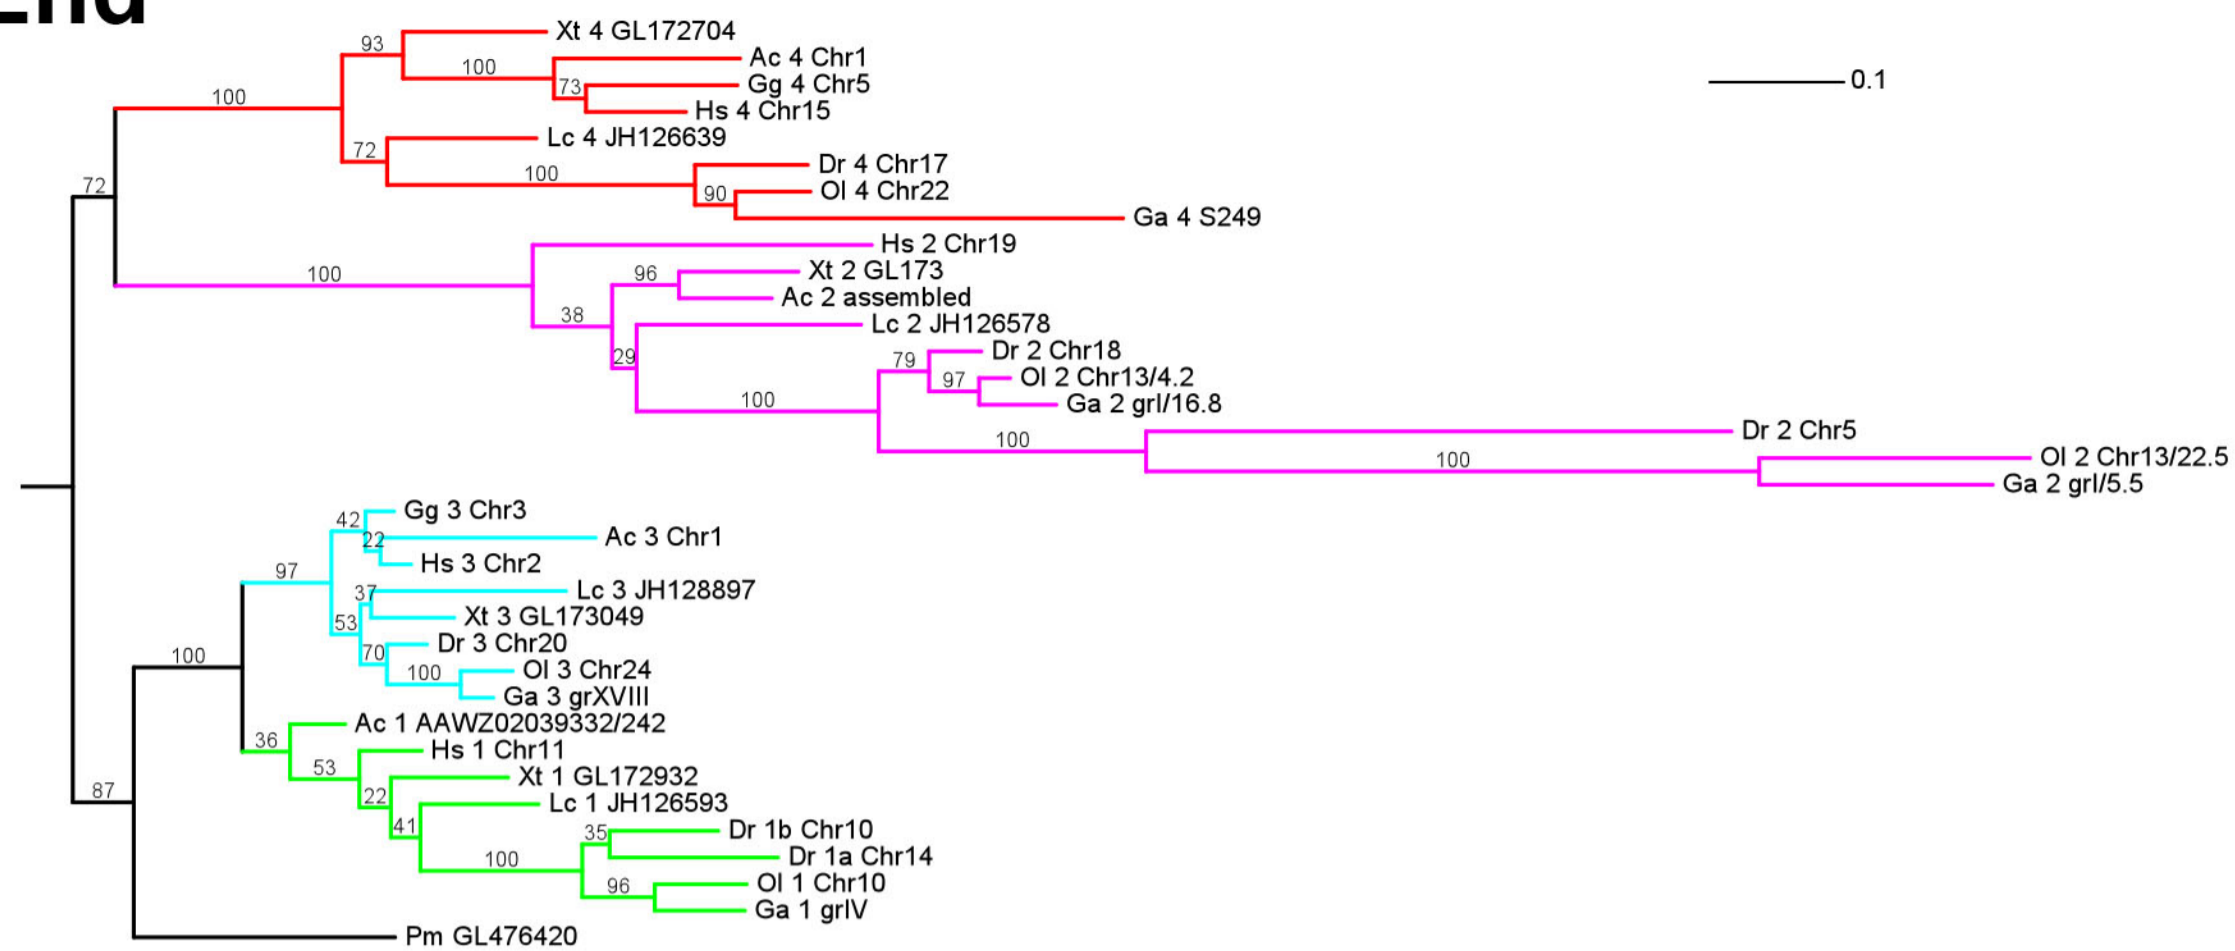

# B. Eml

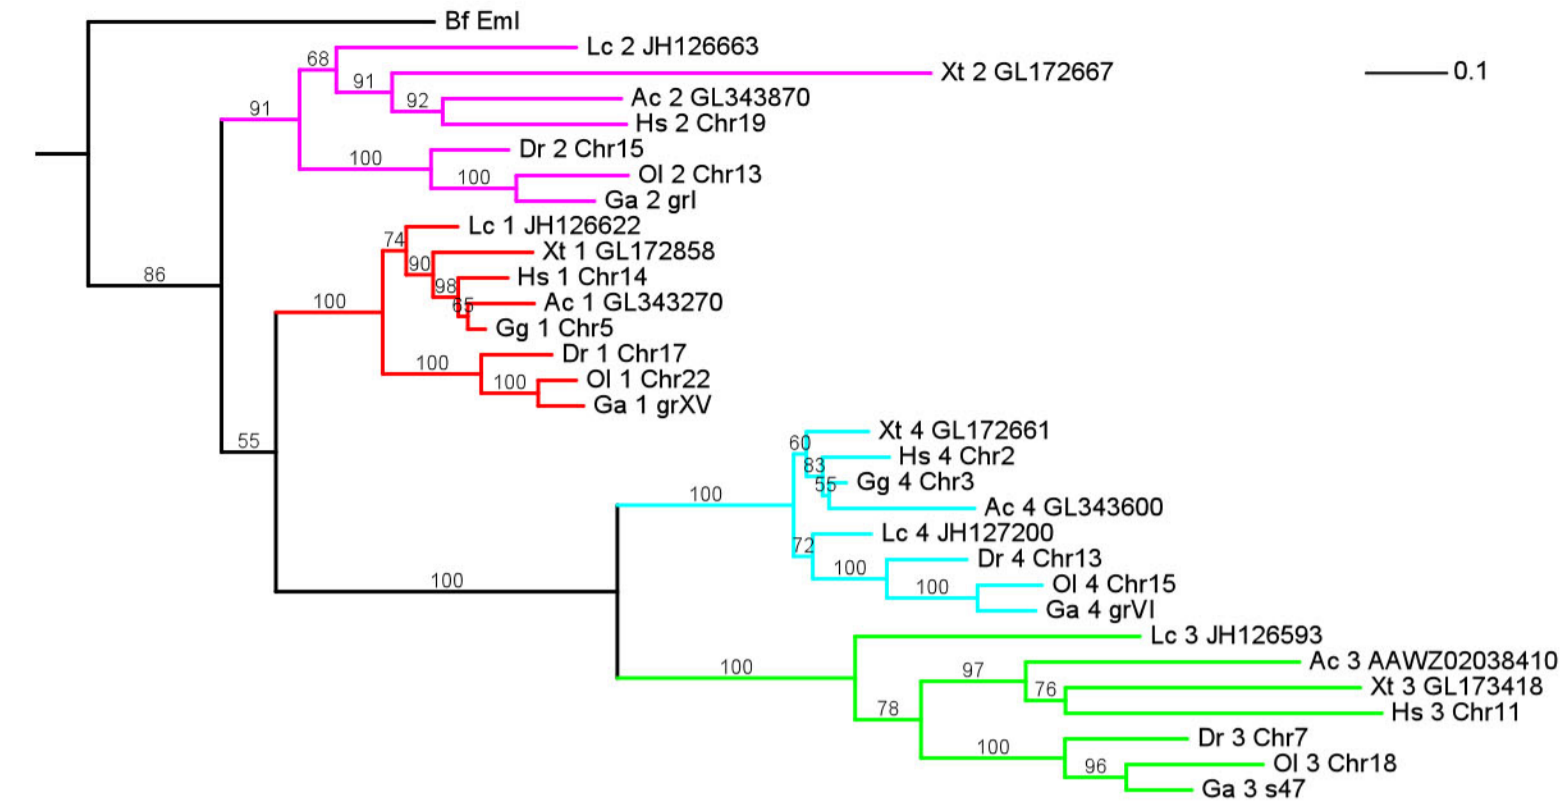

# C. Mark

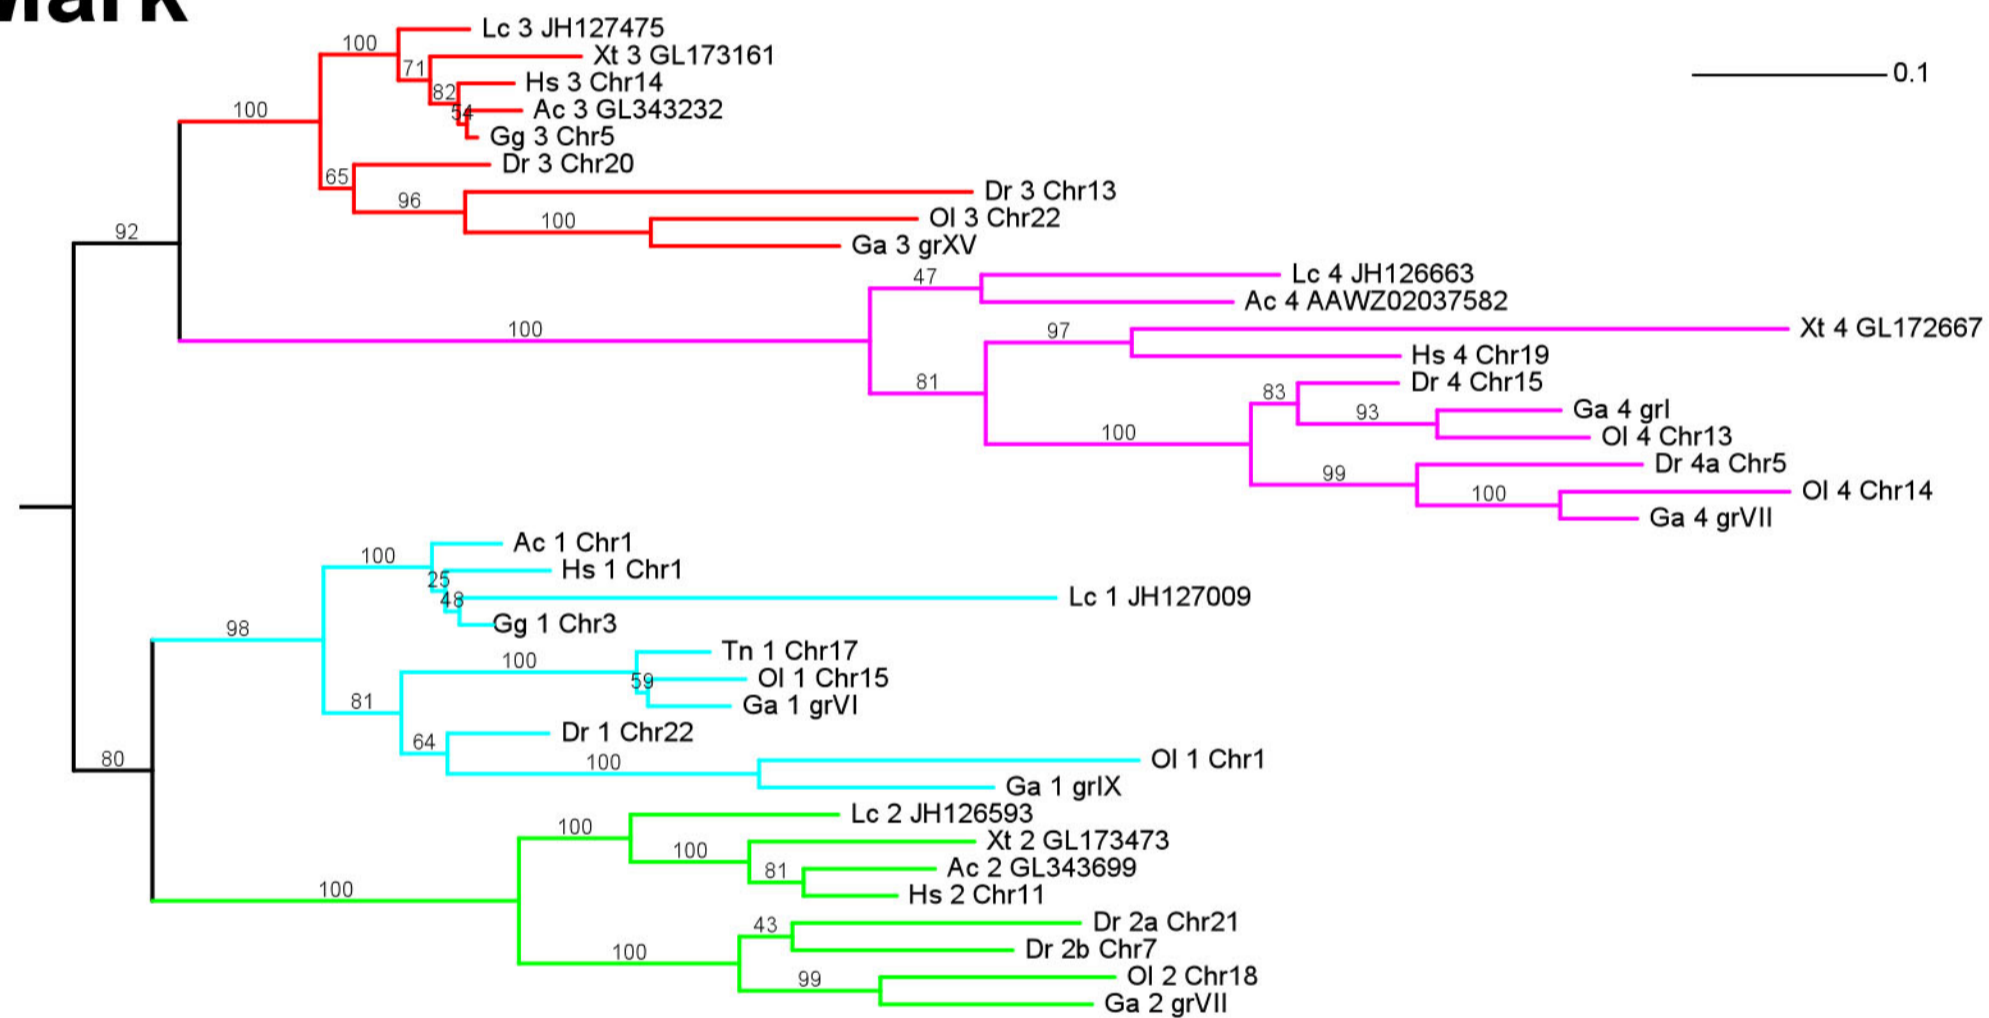

# D. Fos

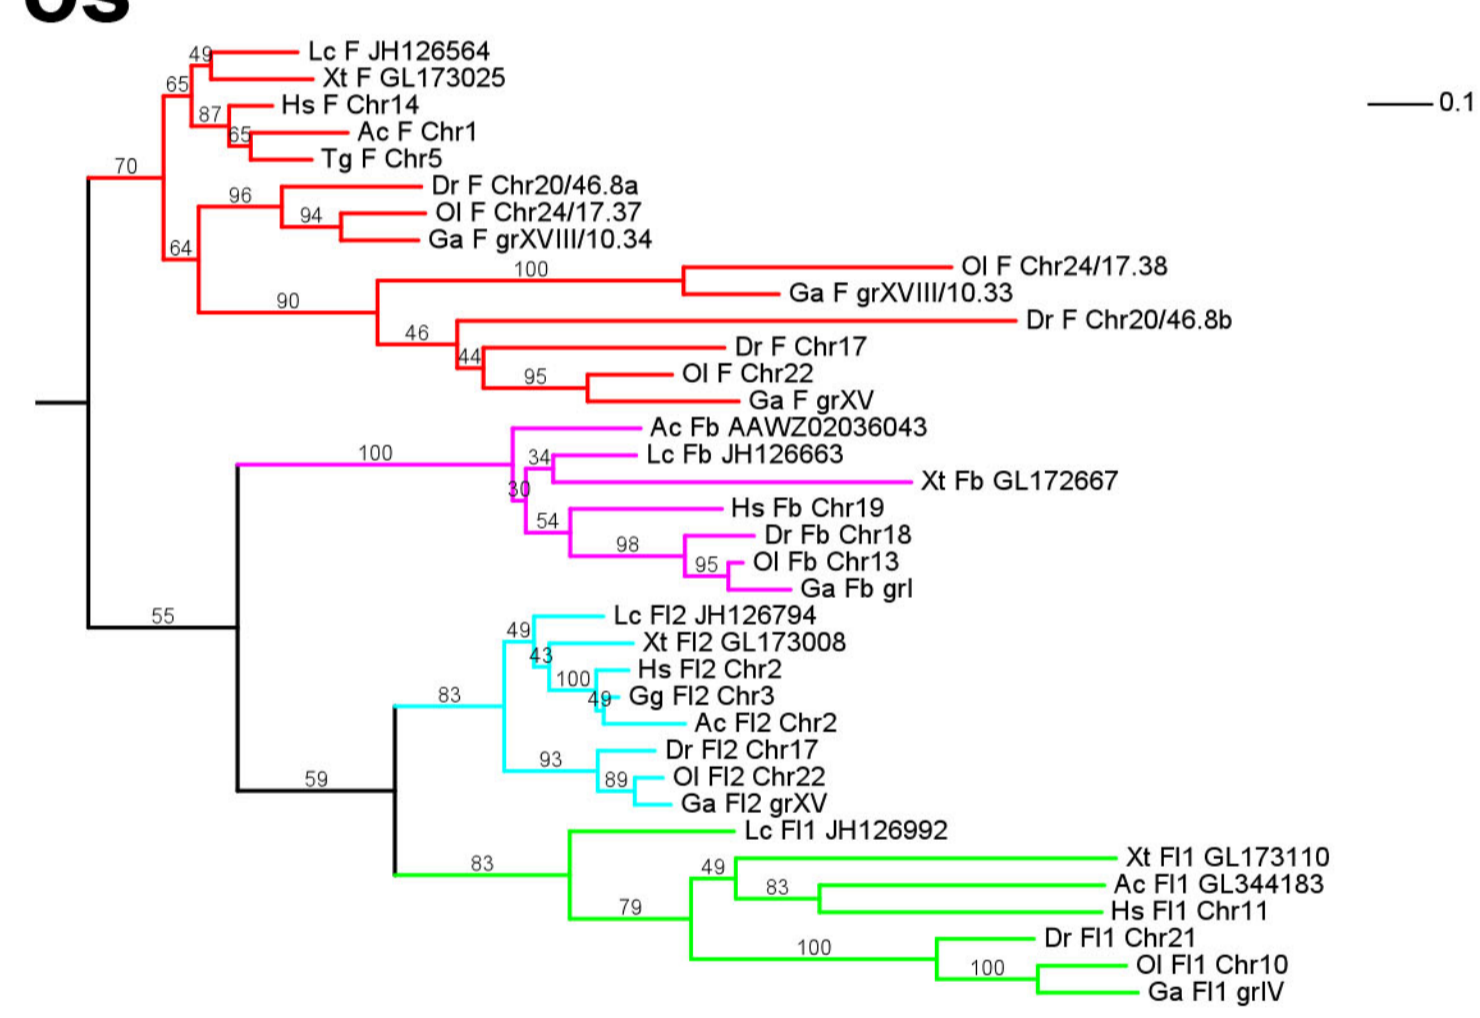

# E. Rtn

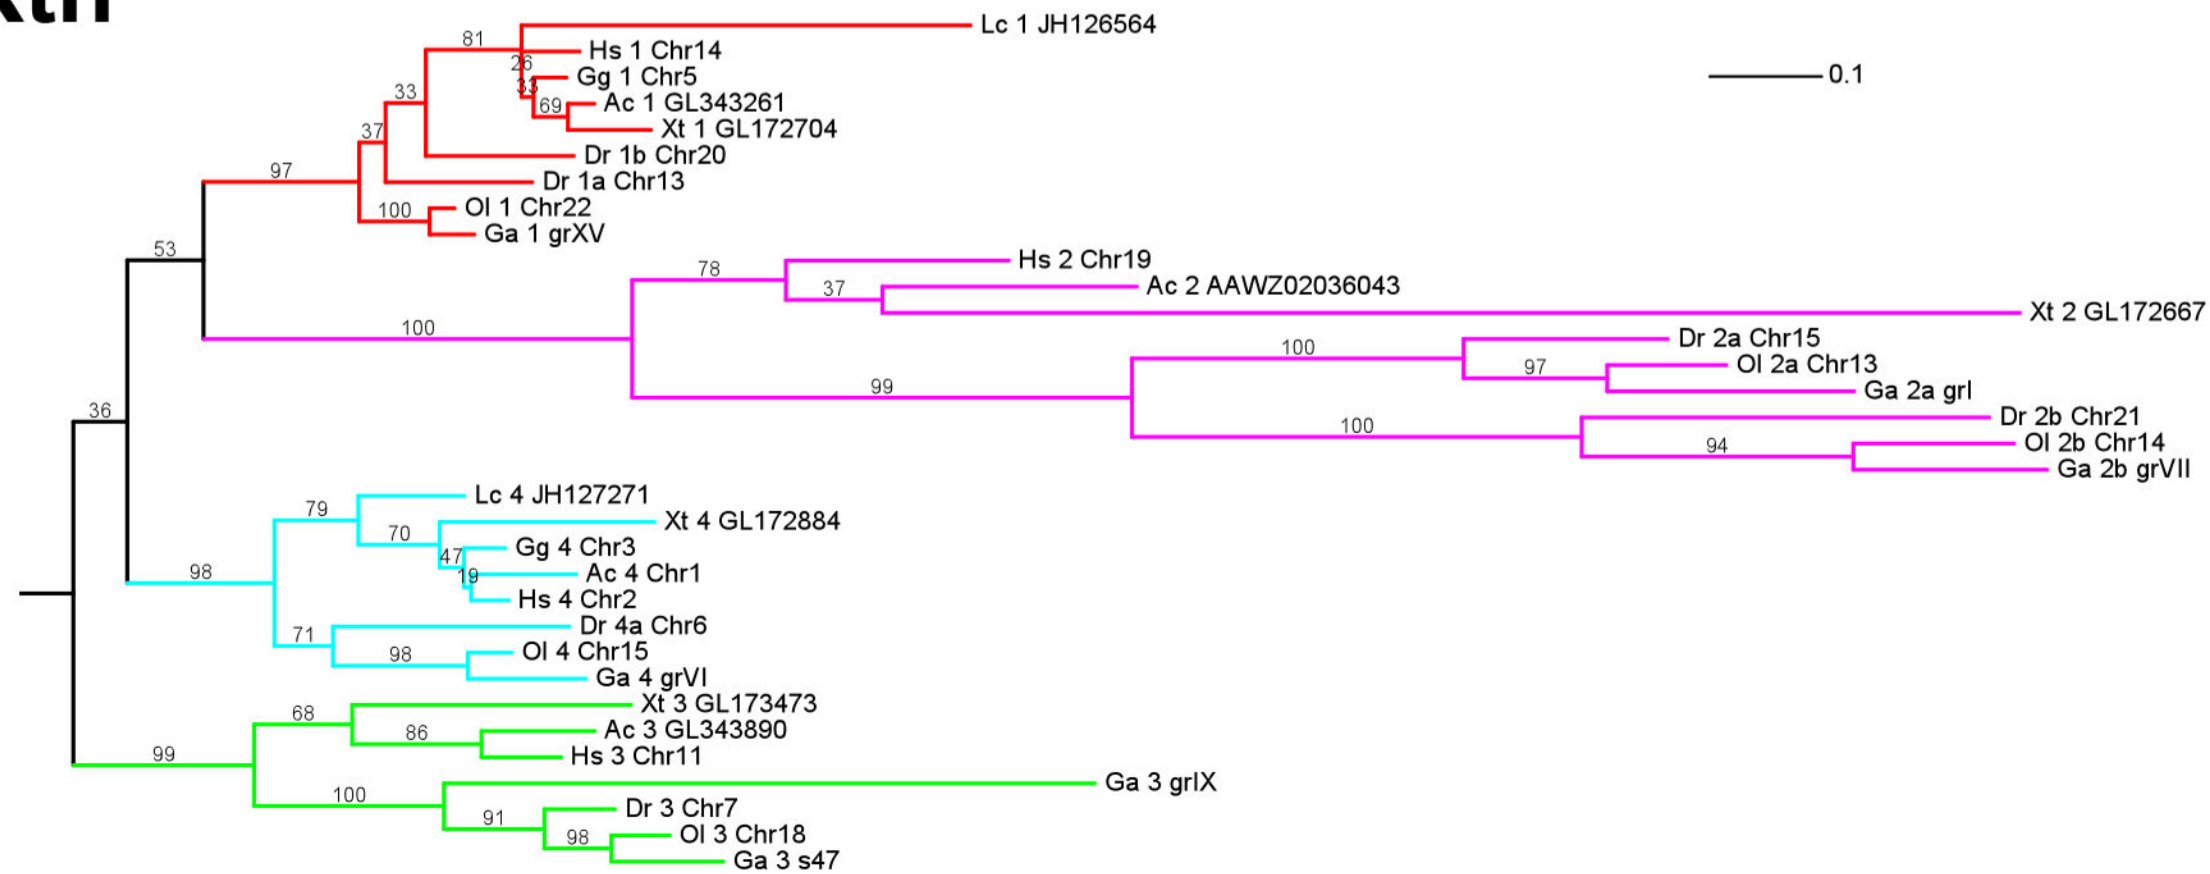

# F. Sipa

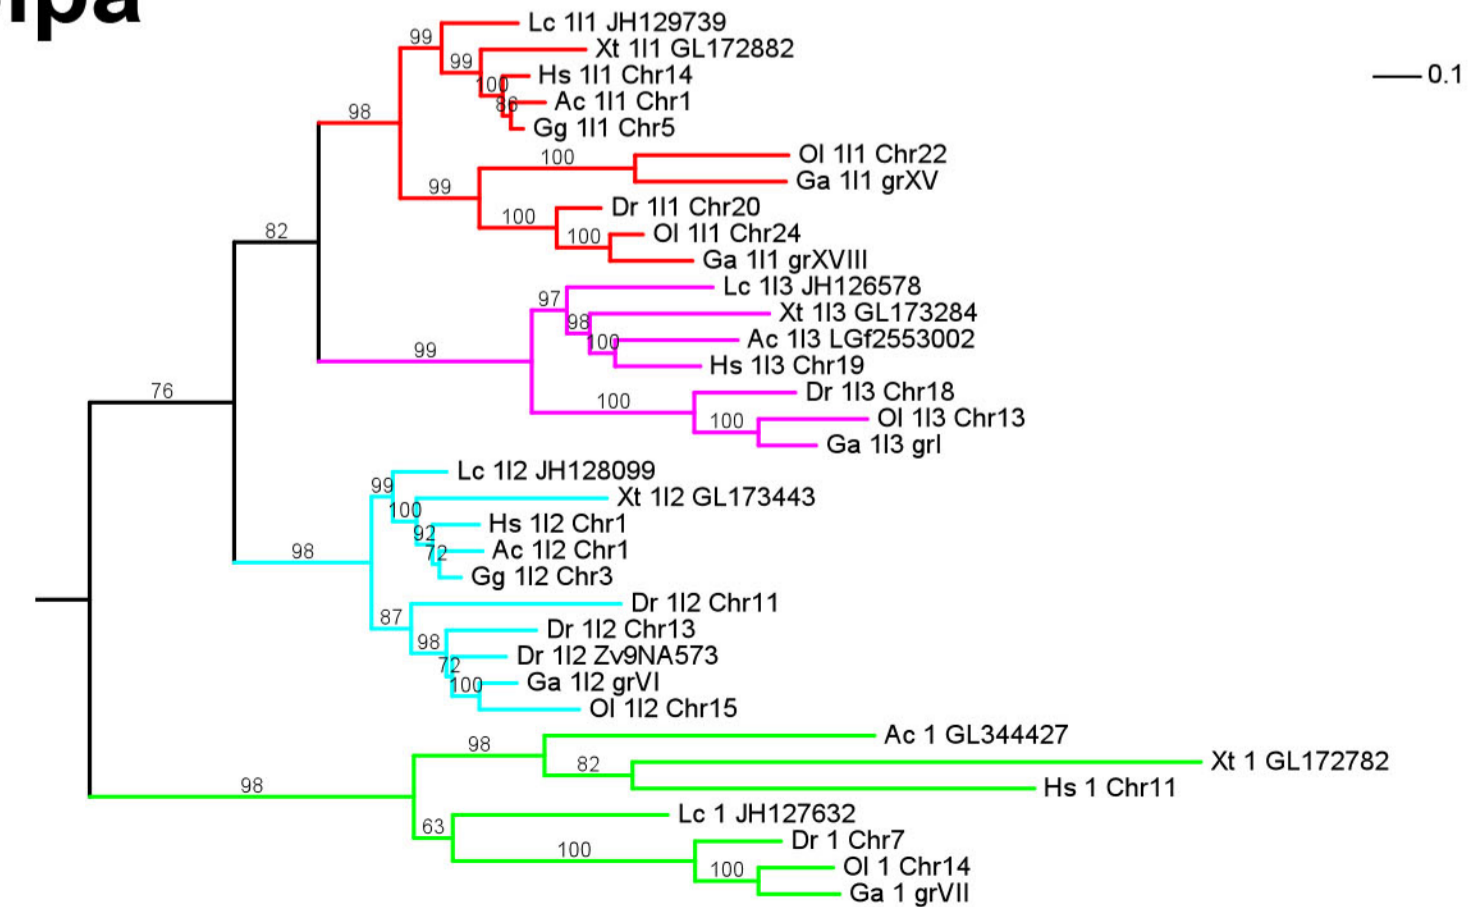

Supplement: 1471-2148-14-157-S7.pdf [file 1471-2148-14-157-S7.pdf]
