# Supplementary material for: Dact genes are chordate specific regulators at the intersection of Wnt and Tgf-β signaling pathways
Source: PubMed Central journal article supplement (PMC4236578; doi:10.1186/1471-2148-14-157), 2014-08-06
Supplement: 1471-2148-14-157-S9.pdf [file 1471-2148-14-157-S9.pdf]

## Additional File 9. Sequences of Dact protein motifs.

Core amino acids (aa) of a motif are underlined, motif variations typical for a particular Dact ortholog are highlighted in yellow, variations typical for Dact1,3 proteins in red and variations typical for Dact2,4 proteins in green. Leucines contributing to a L-zipper are highlighted in blue. The regions containing the linked motifs 2a-f and the linked motifs 11a-g are the most conserved regions in Dact proteins.

### MOTIF 1

**Position:** exon 1-encoded

**Size:** 24-36aa

**Known function:** (region involved in Alk5 blocking)

**Predicted function:** nuclear export signal

**Dact1:** ER-Q/V-RTRER-L/Q-EATLAGL-A/G/T-EL-E/D/G-Y/F-LR-Q/H/R-RQE, followed by conserved LLV

**Dact3:** ER-S/G-R-L/N/T followed by K/R-G/S-WLEGSLAGLCEL-H/P/Q-W/L-LRERQE (amniotes) or K/R-ERLEASLAGLCELEL-L/R-K/R-Q/E-RQE (anamniotes)

**Dact2:** DR-G/S/C/R-RVGERLQAALAGLQEL- (xx) -LR-E/D-K/R-Q

**Dact4:** SLWSG-T/S-E/D-RVRIGERL-K/Q-A-T/S-LAG-V/I/L-LELE-L/V-LR- (x) -K/R-H/Q-L-E/D-MV-D/E **Dact4**

SLWSG-T/S - GRKRIRDRFCATVAGLLELEVLRVKHKVMVE **dact4r**

**Lj dactA:** APRLTAIRLESALAGIRHLESSLKRRQ

**Lj dactB:** ERSRASERLEASMAGLAELELLRRRHE

**Lj dactCorD?:** ERIRARERLEASIAALRELQLLREERE

**Bfl dact:** DRSLQ- (gap) -ARLMASEAAMEELRLLRQRQE

### MOTIF 2a

**Position:** encoded by 3' end of exon 1

**Size:** 5-15aa

**Known function:** (region involved in Alk5 blocking)

**Predicted function:** ---

**Dact1:** conserved EEK followed by F/L-LEENNILLLRKQL

**Dact3:** L/P-EEQL amniotes

L-R/K-R/K-QL Latimeria, gar, teleost dact3a

**Dact2:** conserved E-Q/H followed by RLEATL-T/A/S-ALK-E/Q-QL

**Dact4:** R/G/Q/P-QQV (not conserved in dact4r)

**Lj dactA:** LGGRD-WLYALLV-GPHL

**Lj dactB:** LE-RDFVESLRAM-KEQL

**Lj dactCorD:** DDALLAVGRDLELI-KEQL

**Bfl dact:** CINSIDKLRNAV

### MOTIF 2b

**Position:** encoded by 5' end of exon 2

**Size:** 10-16aa

**Known function:** (region involved in Alk5 blocking)

**Predicted function: ---**

**Dact1:** NCLRRRDAGL

**Dact3:** absent

**Dact2:** SRLRRQDVGL, linked to motif 2c by K-S/T-HL-D/Q-Q

**Dact4:** absent

**Lj dactA:** absent

**Lj dactB:** GCLPQRDLGLL

**Lj dactC:** absent

**LJ dactD:** no sequence available

**Pm dact:** no sequence available

**Bfl dact:** DHLKRTDSDL

**MOTIF 2c**

**Position:** encoded by centre of exon 2

**Size:** 11-13aa

**Known function:** nuclear export signal; region also involved in Alk5 blocking

**Predicted function: ---**

**Dact1:** ELD-K/R-QISDLRLDV

**Dact3:** L-E/G/Q-QQ-V/L-GEI-R/S/K-L/V/I-D/E

**Dact2:** QLD-Q/R-Q/R-ISEIKLDV

**Dact4:** absent

**Lj dactA:** LLEQRFCEI GLRG

**Lj dactB:** HLNEQFSEIKMDM

**Lj dactC:** ALERPLSELRVDT

**LJ dactD:** no sequence available

**Pm dact:** no sequence available

**Bfl dact:** LNTQILQLKLA

**MOTIF 2d**

**Position:** encoded by the 3' end of exon 2

**Size:** 6-9aa

**Known function:** (region involved in Alk5 blocking)

**Predicted function: ---**

**Dact1:** ETDSRPSS

**Dact3:** EQESGRSS - placental mammals

ETDSWPSS - reptiles

DSRPSS - gar, teleost dact3a; no conserved end of exon 2 in teleost dact3b

**Dact2:** L-E/D-SDSRPSS

**Dact4:** E/D-SDSRPSS

**Lj dactA:** ESDSRASS

**Lj dactB:** ETDSRPSS

**Lj dactC:** DVDSRPSS

**LJ dactD:** no sequence available

**Pm dact:** no sequence available

**Bfl dact:** DSRRSS

**MOTIF 2e**

**Position:** encoded by 5' end of exon 3

**Size:** 4-11aa

**Known function:** (region involved in Alk5 blocking)

**Predicted function:** ---

**Dact1:** GFY-E/D-LSDG-A/T-S**G**

**Dact3:** GFYE, followed by D-P/S-S-S/P in amniotes  
or by SSEG-Q/P/L-SP in teleost dact3a;  
not conserved in *Xenopus dact3* and zebrafish dact3b,  
whole exon lacking in acanthopterygian teleost dact3b

**Dact2:** GFY-E/D-LSDG**GSC**

**Dact4:** GFY-E/D-T/V-S-E/D-M/S-G in sarcopterygians  
GFYSVSGS in actinopterygian dact4  
GFC-E/D in gar and zebrafish dact4r

**Pm/Lj dactA:** GFYELSDA**GTG**

**Pm/Lj dactB:** GYDLSDG

**Lj dactC:** GFYSMS**ED**GSL****

**LJ dactD:** no sequence available

**Bfl dact:** GFFDASSP

### MOTIF 2f

**Position:** exon 3-encoded, in the protein sequence closely linked to motif 2e

**Size:** 14-17aa

**Known function:** (region involved in Alk5 blocking)

**Predicted function:** ---

**Dact1:** SLSNS**SN**SVFSECLSS**C**

**Dact3:** absent (**note: whole exon lacking in acanthopterygian teleost dact3b**)

**Dact2:** SLSNS**CT**SVYSE-S/C-L/I/M-SS**S**

**Dact4:** SLS-D/N-S-C/S- (x) -S-V/M-S/H/C-S-E/D- (xx) -PGG

**Pm/Lj dactA:** SLST**SCN**SVFSDLVPSP

**Pm/Lj dactB:** SLSNS**CN**SIF-N/S-DCLS-D/G-S

**Lj dactC:** SLSNS**C**SSISSGPAP

**Pm/LJ dactD:** no sequence available

**Bfl dact:** SPPLTPDIASPEKLH**HY**

### MOTIF 3a

**Position:** encoded by the 3' end of exon 3

**Size:** 7-9aa

**Known function:** (region involved in Alk5 blocking)

**Predicted function:** ---

**Dact1:** absent

**Dact3:** absent (**note: whole exon lacking in acanthopterygian teleost dact3b**)

**Dact2:** **DY** (sarcopterygians, Cm), followed by **R-P/R-R/K-SA** and a conserved **DE**

**Dact4:** **RP-R/H-ST**, followed by **DE** in sarcopterygians  
**RP-R/H-S-L/A-DH** gar, cyprinid teleost dact4  
**PPKLWEQ** other teleosts

**Pm/Lj dactA:** absent

**Pm/Lj dactB:** absent

**Lj dactC:** **RPRSAVE**

**Pm/LJ dactD:** no sequence available

**Bfl dact:** absent

### MOTIF 3b

**Position:** encoded by the 3' end of exon 3

**Size:** 6-7aa

**Known function:** (region involved in Alk5 blocking)

**Predicted function:** ---

**Dact1:** D/E-G-R/C/Q-P/L/A-KSA

**Dact3:** S/N/C-ERPKS-V/L/A

**whole exon lacking in acanthopterygian teleost dact3b**

**Dact2:** RPRPVST

**Dact4:** RRP-V/F-ST **sarcopterygians, gar, cyprinid teleost Dact4**

**Pm/Lj dactA:** ERRPLST

**Lj dactB:** LERPLSS

**Lj dactC:** PSRPQSS

**Pm/LJ dactD:** no sequence available

**Bfl dact:** absent

### MOTIF 3c

**Position:** encoded by 5' end of exon 4

**Size:** 3-4aa

**Known function:** (region implicated in Alk5 blocking and Tcf3 binding)

**Predicted function:** ---

**Dact1:** DLI

**Dact3:** G-D-A/P/V

**Dact2:** G-DL **followed by conserved** E/D-R

**Dact4:** G-DLE

**Pm/Lj dactA:** G-DLK

**Pm/Lj dactB:** G-DLL

**Lj dactC:** DLG

**Pm/Lj dactD:** absent

**Bfl dact:** GESD

### MOTIF 4a

**Position:** exon 4-encoded, motif approximately 25 aa downstream of motif 3c

**Size:** 10-11aa

**Known function:** (region implicated in Alk5 blocking and Tcf3 binding)

**Predicted function:** ---

**Dact1:** VCRS-L/F/P-S-T/A-P-H/Q-S/F-N **- most tetrapods**

VRRSFSAPYS **- gar, teleosts**

**Dact3:** V/L-PRSFSAPYP-YP **not conserved in teleost dact3b**

**Dact2:** absent

**Dact4:** absent

**Pm/Lj dactA:** VRRSASEHGS

**Pm/Lj dactB:** TPGPPPPA-G/A-CP

**Lj dactC:** LADPVTSAPGR

**Pm/Lj dactD:** absent

**Bfl dact:** absent

### MOTIF 4b

**Position:** exon 4-encoded, motif approximately 15 aa downstream of motif 4a

**Size:** 12-35aa

**Known function:** (region implicated in Alk5 blocking and Tcf3 binding)

**Predicted function:** ---

**Dact1:** DV-H/N/Q followed by PKYQC<sup>U</sup>DLVSKNGND-V/I-YRYPSPLHAVA<sup>V</sup>QSPMF

**Dact3:** FLYPSPLHAVA-L/M – conserved in sarcopterygians only

KKHATLA weak similarity in teleost dact3b

**Dact2:** <sup>D</sup> followed by PK-Y/F-Q-S/N/R/C-D/N-LVS-K/R-N/S/G-G- (x) -D/E-VY-P/H/L/R-YPSPLHAVALQSPLFS

**Dact4:** <sup>L</sup><sup>D</sup> followed by P-R/K-Y-C/K/R-T/S/C-DLVS-R/R/N/K/S-<sup>T</sup>-K/S-EVY-H/S/P/R-YPSPLHAVALQSPLF

**Pm/Lj dactA:** LSPP-W/R-LTVLDS-A/V-E-S/P-V/G-APSA-N/H-PAMTPDTRS

**Pm/Lj dactB:** EASGRYVSDLTSRDGS<sup>D</sup>VYRYPSPPLHAVA<sup>I</sup>QSPLE

**Lj dactC:** <sup>D</sup>PRFRCDLRSRDGSEVYRYPSPPLHAIAMQSSAF

**Pm/Lj dactD:** TRRFARDVPSLDGSGLYRYPSPALHAVA<sup>I</sup>QSPAL

**Bfl dact:** FKLALRPRSKTGLSVCYPYSPMHAI<sup>I</sup>QSDM

### MOTIF 5a

**Position:** exon 4-encoded, approximately 80-110 aa downstream of motif 4b

**Size:** 9-14aa

**Known function:** region implicated in Tcf3 binding

**Predicted function:** ---

**Dact1:** KK followed by <sup>D</sup>-G/S-YILSL-V/L/I-Q-K/R-K/R

**Dact3:** R/H-R/K-V/L/A-E-G/T/S/N-YI-L/S/F-G/S/A/R-L-I/L-Q/R-RR

**Dact2:** GYI-N/D-K/R-LL-Q/R-L/R

**Dact4:** L-D/E-Q/R-YI-S/A-R/K-L- (xx) R/Q (not dact4r)

**Pm/Lj dactA:** A/V-R-S/G-DAALPI-A/T-KQQ

**Pm/Lj dactB:** ERVSGYICSL<sup>L</sup>DRK

**Lj dactC:** DKVTAYIAALLKRR

**Pm/Lj dactD:** GKPDYIAR<sup>L</sup>L<sup>L</sup>ER

**Bfl dact:** SAG<sup>L</sup>L<sup>L</sup>RPV

### MOTIF 5b

**Position:** exon 4-encoded, linked to motif 5a

**Size:** 9-10aa

**Known function:** (region implicated in Tcf3 and Dvl binding)

**Predicted function:** ---

**Dact1:** conserved V followed by RTN<sup>K</sup>PRTS-L/V/I

**Dact3:** RP-S/C/G-K/Q-PRT-S/T-L

**Dact2:** absent

**Dact4:** absent

**Pm/Lj dactA:** absent

**Pm/Lj dactB:** NGRL<sup>KPK</sup>H<sup>E</sup>E

**Lj dactC:** PALV<sup>RP</sup>ASIA

**Pm dactD:** CRLSR<sup>PR</sup>RTP (LjD: VRLSLRSP<sup>L</sup>LP)

**Bfl dact:** KAPR<sup>KPK</sup>PTP

### MOTIF 5c

**Position:** exon 4-encoded, linked to motif 5c

**Size:** 6-12aa

**Known function:** (region implicated in Dvl binding)

**Predicted function:** ---

**Dact1:** K-G/S-I/L-L followed by R-H/Q/N-GS-M/V/L/I-CVR

**Dact3:** RRQ-S/N-S-L/V-C/R/H (less conserved but recognisable in teleost dact3a)

**Dact2:** GGV followed by KINSSSQL and EK in birds and reptiles; motif recognizable in mammals

**Dact4:** K/R-SH-(x)-S-(x)-Q/S-S-L/V-S/C

**Pm/Lj dactA:** absent

**Pm/Lj dactB:** KPDTLQ-C/G-VDSCKE

**Lj dactC:** absent

**Lj dactD:** absent (**PmD:** no sequence available for motifs 6-11g)

**Bfl dact:** RQSLLK

## MOTIF 6

**Position:** exon 4-encoded

**Size:** 9aa

**Known function:** ---

**Predicted function:** ---

**Dact1:** absent

**Dact3:** absent

**Dact2:** absent

**Dact4:** R/K-I/S/T-R-R/P-RISTC (no sequence available for dact4r)

**Pm/Lj dactA:** absent

**Pm/Lj dactB:** absent

**Lj dactC:** absent

**Lj dactD:** absent

**Bfl dact:** absent

## MOTIF 7a

**Position:** exon 4-encoded, approximately 250aa downstream of motif 3c and 100-120aa downstream of motif 5

**Size:** 21aa **Known function:** ---

**Predicted function:** ---

**Dact1:** EERP-A/P/I-L-D/E-F/L-KS-E/L-GSSSQSL-D/E-E/D-G

**Dact3:** absent

**Dact2:** absent

**Dact4:** absent (no sequence available for dact4r)

**Pm/Lj dactA:** absent

**Pm/Lj dactB:** absent

**Lj dactC:** absent

**Lj dactD:** absent

**Bfldact:** absent

## MOTIF 7b

**Position:** exon 4-encoded, linked to motif 7a

**Size:** 10-14aa

**Known function:** ---

**Predicted function:** ---

**Dact1:** LVN followed by A-Q/H-Y/F-IPAQQ  
**Dact3:** L/M-V-S/K/N followed by AQYIP-G/A-Q/A -most species  
LV-S/N-A-Q/K/E/S-YIP-G/A-Q -teleosts  
**Dact2:** EFVH followed by A-Q/K-FVPA-E/G-S-H/Q-Q/R  
**Dact4:** absent (no sequence available for dact4r)  
**Pm/Lj dactA:** VMMAIPEEQQ  
**Pm/Lj dactB:** TAIKSSKK  
**Lj dactC:** absent  
**Lj dactD:** absent  
**Bfl dact:** absent

### MOTIF 7c

**Position:** exon 4-encoded, linked to motif 7b  
**Size:** 14-16aa  
**Known function:** ---  
**Predicted function:** ---  
**Dact1:** K/R-NV followed by KI-L/V-KVKSS-T/A/S-LKHR  
**Dact3:** absent  
**Dact2:** KT followed by KAVK-L/I/V-KRR-N/S-SEK  
**Dact4:** absent (no sequence available for dact4r)  
**Pm/Lj dactA:** KIVKFAKTSRCREPSG  
**Pm/Lj dactB:** KRLGPTKARPPKVEE  
**Lj dactC:** absent  
**Lj dactD:** absent  
**Bfl dact:** absent

### MOTIF 8a

**Position:** exon 4-encoded  
**Size:** 4-5aa  
**Known function:** nuclear localization  
**Predicted function:** ---  
**Dact1:** REK- (x) -K/R  
**Dact3:** RE-K/R-P-R/K (in sarcopterygians except *Xenopus*)  
**Dact2:** E-K/R- (x) -R  
**Dact4:** absent (no sequence available for dact4r)  
**Pm/Lj dactA:** (KGGRQ)  
**Pm/Lj dactB:** absent  
**Lj dactC:** absent  
**Lj dactD:** absent  
**Bfl dact:** absent

### MOTIF 8b

**Position:** exon 4-encoded, linked to motif 8a  
**Size:** 6-8aa  
**Known function:** nuclear localization  
**Predicted function:** ---  
**Dact1:** KKCRFP-D/E-D/E  
**Dact3:** K/R-K/R-C/G/N-R/H- (xx) -E-D/R/E (in non-mammalian sarcopterygians and teleost dact3b)

**Dact2:** absent  
**Dact4:** absent (no sequence available for dact4r)  
**Pm/Lj dactA:** KRCRFSED  
**Pm/Lj dactB:** Q/P-RARRRDE  
**Lj dactC:** RICKLGHG  
**Lj dactD:** RRCKSASL  
**Bfl dact:** RRCNEN

### MOTIF 8c

**Position:** exon 4-encoded, linked to motif 8b  
**Size:** 3-4aa  
**Known function:** nuclear localization  
**Predicted function:** ---  
**Dact1:** KK- (xx) -KK  
**Dact3:** R/K-R/K  
**Dact2:** RRP  
**Dact4:** absent (no sequence available for dact4r)  
**Pm/Lj dactA:** absent  
**Pm/Lj dactB:** absent  
**Lj dactC:** absent  
**Lj dactD:** absent  
**Bfl dact:** absent

### MOTIF 9

**Position:** exon 4-encoded  
**Size:** 5-8aa  
**Known function:** ---  
**Predicted function:** ---  
**Dact1:** SESSL (only in cartilaginous fish)  
**Dact3:** RSQSENSL  
**Dact2:** RSCSESSL  
**Dact4:** absent (no sequence available for dact4r)  
**Pm/Lj dactA:** RSQSDNSI  
**Lj dactB:** absent (**PmB:** no sequence available for motifs 9-11d)  
**Lj dactC:** absent  
**Lj dactD:** absent  
**Bfl dact:** absent

### MOTIF 10

**Position:** exon 4-encoded  
**Size:** 7-13aa  
**Known function:** ---  
**Predicted function:** ---  
**Dact1:** HGHGRE-V/A/Q/P-V-V/L-A  
**Dact3:** V/A/L-PE- (xxx) -R/P-K/R-Y- (x) -T- (x) -ER-D/E  
**Dact2:** no conservation in this region  
**Dact4:** LY-R/K-GKHAS-H/R-E/K-LV-R/K (no sequence available for dact4r)  
**Pm/Lj dactA:** absent  
**Lj dactB:** absent



**Lj dactC:** EREETAG  
**Lj dactD:** ERGKMAAAAAECAD  
**Bfl dact:** absent

### MOTIF 11a

**Position:** exon 4-encoded, start of conserved region approximately 200 aa from C-terminus

**Size:** 4-9aa

**Known function:** ---

**Predicted function:** nuclear localization signal

**Dact1:** KPKHKR-A/T/G/N-DY

**Dact3:** R-P/Q-RR (amniotes, Lc, gar)  
R/K- (x) -R/K-R/K (teleost dact3b)

**Dact2:** KKKQ

**Dact4:** LRKKP followed by WKKP (Latimeria; 1st stretch maintained in sarcopterygians, 2nd stretch in teleosts)

**Pm/Lj dactA:** RQRRLSSH

**Lj dactB:** GVKRLAQQ

**Lj dactC:** YRRRLVLH

**Pm/Lj dactD:** absent

**Bfl dact:** absent

### MOTIF 11b

**Position:** exon 4-encoded, linked to motif 11a

**Size:** 9-15aa

**Known function:** ---

**Predicted function:** ---

**Dact1:** RRWKSSAEISYEEA

**Dact3:** RRW-R/C-S-T/N-L/A-E-L/I-SQDE-G/A-E

**Dact2:** RKWQSTVEIS

**Dact4:** KW-T/A/V/M-SVLEIS (in sarcopterygians and Cm; no sequence for the gar)

**Pm/Lj dactA:** RRWRSTVEICQAA

**Lj dactB:** SRELVQSHG

**Lj dactC:** RRWCSTMEIARGGG

**Lj dactD:** RRLCRAGDAGGDWA

**Bfl dact:** absent

### MOTIF 11c

**Position:** exon 4-encoded, linked to motif 11b

**Size:** 5-10aa

**Known function:** ---

**Predicted function:** ---

**Dact1:** RRARR-R/N-Q/A/N-RRE

**Dact3:** RR- (xx) -RR- (x) -R

**Dact2:** PR-Q/P-P/A-A/G-RRAG (sarcopterygians and gar)

**Dact4:** RRALFRS (only teleosts)

**Pm/Lj dactA:** RRASRR-D/E-A

**Lj dactB:** RRRPAPARVR

**Lj dactC:** MRAGARDG

**Lj dactD:** DRCYPSAAG  
**Bfl dact:** absent

### MOTIF 11d

**Position:** exon 4-encoded

**Size:** 32-40aa

**Known function:** (region involved in Vangl binding)

**Predicted function:** ---

**Dact1:** highly conserved stretch of 32aa, starts with SDSEYSAEC and ends with TTNC

**Dact3:** present in *Latimeria*, but only parts in the other species

**Dact2:** highly conserved stretch of 30aa, starts with R/K-SESD- (x) -SEYSAEC and ends with T-  
T/A-N-R/C

**Dact4:** absent

**Pm/Lj dactA:** present from ESDSEYSAEC to DDD, interrupted by intron

**Lj dactB:** present from DSEYSAEC to TTNR

**Lj dactC:** only parts present: SAIAEM and SED

**Lj dactD:** absent

**Bfl dact:** absent

### MOTIF 11e

**Position:** exon 4-encoded

**Size:** 26-28aa

**Known function:** (region involved in Vangl binding)

**Predicted function:** ---

**Dact1:** highly conserved S-rich stretch of 28aa, starts with FGDSESS and ends with **ESGG**

**Dact3:** highly conserved S-rich stretch of 26aa, starts with E/D-SESS and ends with **ESGG**

**Dact2:** conserved S-rich stretch, starts with FGDSESS and ends with a block of acidic aa

**Dact4:** S-rich stretch, ill-conserved between sarcopterygians and actinopterygians

**Pm/Lj dactA:** acidic aa alignable, but no S-rich stretch

**Pm/Lj dactB:** acidic aa alignable, but few S residues

**Lj dactC:** some similarity with dactA

**Lj dactD:** absent

**Bfl dact:** array of S, G and acidic aa that resembles sequences from gnathostome Dacts

### MOTIF 11f

**Position:** exon 4-encoded

**Size (aa):** 3-9

**Known function:** involved in Vangl binding

**Predicted function:** ---

**Dact1:** L-I/N/V-W-S/P-QF

**Dact3:** LVWPQQLPP

**Dact2:** L-V/I-W

**Dact4:** absent

**Pm/Lj dactA:** L-A/T-GS-L/T-A

**Pm/Lj dactB:** LAGRRG

**Lj dactC:** absent

**Lj dactD:** absent

**Pm dactB:** PVV

**Bfl dact:** LVL

## MOTIF 11g

**Position:** exon 4-encoded, C-terminus

**Size:** 14-33aa

**Known function:** PDZ binding domain; binds Dvl in Dacts 1-3

**Predicted function:** ---

**Dact1:** K-A/T-F-V followed by KIKASHNLKKKILRF<sup>R</sup>SGSLKLMTTV

**Dact3:** K-A/V-F-V followed by KIKASHAL<sup>H</sup>KKKI-L/M-RFR-S/T-GSLKVM<sup>T</sup>TV

**Dact2:** P-(x)-LPP-V/E-P-(xx)-C followed by RIKASKAL<sup>K</sup>LKKI<sup>R</sup>RFQ<sup>P</sup>ASLKVMT-M/L-V

**Dact4:** L-H/R/Y-R-S/T-R<sup>S</sup>FKEL<sup>K</sup>K-R/M/V-V (plus 11-16 additional aa in sarcopterygians) or  
L-Q/T-R<sup>S</sup>RSLRD<sup>L</sup>GRK<sup>V</sup>FGSMRSLSLK<sup>R</sup>KPS<sup>K</sup>K (most teleosts; dact4r- no sequence available)

**Lj dactA:** CRIKASHAL<sup>H</sup>KKKI<sup>L</sup>RC<sup>R</sup>SGSLKLMTTV

**Pm/Lj dactB:** CRIKAS<sup>R</sup>SL<sup>K</sup>KKMMHF<sup>R</sup>SGSLKVITTV

**Lj dactC:** CRVS (QQVRA) VPSAVK<sup>R</sup>KIRQRIADAAKTSTDV

**Lj dactD:** PAARRRALLR<sup>C</sup>HSVEPALTTTV

**Bfl dact:** ATRRRLSSQDSL<sup>S</sup>RMF<sup>P</sup>SCHLVTEL
