# Supplementary material for: Dact genes are chordate specific regulators at the intersection of Wnt and Tgf-β signaling pathways
Source: PubMed Central journal article supplement (PMC4236578; doi:10.1186/1471-2148-14-157), 2014-08-06
Supplement: 1471-2148-14-157-S10.pdf [file 1471-2148-14-157-S10.pdf]

## **Additional File 10. Alignments of gnathostome Dact proteins.**

Gapped alignment of Dact protein sequences, protein motifs are annotated. Additional gaps have been introduced to facilitate the identification of exon boundaries.

A. Dact1.

B. Dact2.

C. Dact3.

D. Dact4.





10 20 30 40 50 60 70 80 90 100 110 120 130 140 150 160 170 180 190 200
Hs 2 MRP...
Mn 2 WMAPS...
Bt 2 ex2-4 MRA...
Cf 2 MRA...
Mg 2 MRA...
Oa 2 MRA...
Gg 2 MRA...
Mg 2 ex2-4 MRA...
Mn 2 MRA...
Ac 2 MRA...
Pym 2 ex2-4 MRA...
Cpb 2 MRA...
Pa 2 ex1-3 MRA...
Lc 2 MRA...
Mg 2 MRA...
Dr 2 MRA...
Oa 2 ex1-3 MRA...
Go 2 MRA...
Mn 2 MRA...
Tn 2 MRA...
Ga 2 MRA...
O1 2 ex2-4 MRA...
Mn 2 MRA...
Xa 2 MRA...
Tc 2 ex3-4 MRA...
Ca 2 ex2-4 MRA...
Exons motifs
Leu zipper

210 220 230 240 250 260 270 280 290 300 310 320 330 340 350 360 370 380 390 400
Hs 2 MRA...
Mn 2 WMAPS...
Bt 2 ex2-4 MRA...
Cf 2 MRA...
Mg 2 MRA...
Oa 2 MRA...
Gg 2 MRA...
Mg 2 ex2-4 MRA...
Mn 2 MRA...
Ac 2 MRA...
Pym 2 ex2-4 MRA...
Cpb 2 MRA...
Pa 2 ex1-3 MRA...
Lc 2 MRA...
Mg 2 MRA...
Dr 2 MRA...
Oa 2 ex1-3 MRA...
Go 2 MRA...
Mn 2 MRA...
Tn 2 MRA...
Ga 2 MRA...
O1 2 ex2-4 MRA...
Mn 2 MRA...
Xa 2 MRA...
Tc 2 ex3-4 MRA...
Ca 2 ex2-4 MRA...
Exons motifs
Leu zipper

410 420 430 440 450 460 470 480 490 500 510 520 530 540 550 560 570 580 590 600
Hs 2 MRA...
Mn 2 WMAPS...
Bt 2 ex2-4 MRA...
Cf 2 MRA...
Mg 2 MRA...
Oa 2 MRA...
Gg 2 MRA...
Mg 2 ex2-4 MRA...
Mn 2 MRA...
Ac 2 MRA...
Pym 2 ex2-4 MRA...
Cpb 2 MRA...
Pa 2 ex1-3 MRA...
Lc 2 MRA...
Mg 2 MRA...
Dr 2 MRA...
Oa 2 ex1-3 MRA...
Go 2 MRA...
Mn 2 MRA...
Tn 2 MRA...
Ga 2 MRA...
O1 2 ex2-4 MRA...
Mn 2 MRA...
Xa 2 MRA...
Tc 2 ex3-4 MRA...
Ca 2 ex2-4 MRA...
Exons motifs
Leu zipper

610 620 630 640 650 660 670 680 690 700 710 720 730 740 750 760 770 780 790 800
Hs 2 MRA...
Mn 2 WMAPS...
Bt 2 ex2-4 MRA...
Cf 2 MRA...
Mg 2 MRA...
Oa 2 MRA...
Gg 2 MRA...
Mg 2 ex2-4 MRA...
Mn 2 MRA...
Ac 2 MRA...
Pym 2 ex2-4 MRA...
Cpb 2 MRA...
Pa 2 ex1-3 MRA...
Lc 2 MRA...
Mg 2 MRA...
Dr 2 MRA...
Oa 2 ex1-3 MRA...
Go 2 MRA...
Mn 2 MRA...
Tn 2 MRA...
Ga 2 MRA...
O1 2 ex2-4 MRA...
Mn 2 MRA...
Xa 2 MRA...
Tc 2 ex3-4 MRA...
Ca 2 ex2-4 MRA...
Exons motifs
Leu zipper

810 820 830 840 850 860 870 880 890 900 910 920 930 940 950 960 970 980 990 1000
Hs\_2
Ms\_2
Bt\_2\_ex2-4
Cf\_2
Md\_2
Oa\_2
Gg\_2
Mg\_2\_ex2-4
Tg\_2
Ap\_2\_ex2-4
Mu\_2
Ac\_2
Pym\_2\_ex2-4
Opb\_2
Pa\_2
Pa\_2\_ex1-3
Lo\_2
Lo\_2
Dr\_2
Gmo\_2\_ex1-3
Gmo\_2
Tr\_2
Tn\_2
Ga\_2
Ol\_2\_ex2-4
On\_2
Xm\_2
Tc\_2\_ex3-4
Ca\_2\_ex2-4
Exons
motifs
Leu zipper

Hs\_2
Ms\_2
Bt\_2\_ex2-4
Cf\_2
Md\_2
Oa\_2
Gg\_2
Mg\_2\_ex2-4
Tg\_2
Ap\_2\_ex2-4
Mu\_2
Ac\_2
Pym\_2\_ex2-4
Opb\_2
Pa\_2
Pa\_2\_ex1-3
Lo\_2
Lo\_2
Dr\_2
Gmo\_2\_ex1-3
Gmo\_2
Tr\_2
Tn\_2
Ga\_2
Ol\_2\_ex2-4
On\_2
Xm\_2
Tc\_2\_ex3-4
Ca\_2\_ex2-4
Exons
motifs
Leu zipper



610 620 630 640 650 660 670 680 690 700 710 720 730 740 750 760 770 780 790 800
Hs\_3 ...
Mm\_3 ...
Bt\_3 ...
La\_3 ...
Md\_3\_ext-4 ...
Oa\_3 ...
Ac\_3\_ext-4 ...
Pym\_3\_ext-4 ...
Cpb\_3 ...
Pa\_3\_ext4 ...
Xt\_3 ...
Xl\_3\_A ...
Xl\_3\_B ...
Lo\_3 ...
Lo\_3 ...
Lo\_3 ...
Dr\_3a ...
Pp\_3a\_ext-4 ...
Gmo\_3a\_ext-4 ...
Tr\_3a ...
Tr\_3a ...
Ga\_3a ...
O1\_3a ...
On\_3a ...
Xm\_3a ...
Dr\_3b ...
Omy\_3a/b\_ext4 ...
Omy\_3b\_ext4 ...
Gmo\_3b\_ext4 ...
Tr\_3b\_ext14 ...
Tr\_3b ...
O1\_3b ...
On\_3b ...
Hb\_3\_ext1 ...
Cm\_3\_ext4 ...
Exons ...
motifs ...
Leu zipper ...
Leu zipper

810 820 830 840 850 860 870 880 890 900 910 920 930 940 950 960 970 980 990 1000
Hs\_3 ...
Mm\_3 ...
Bt\_3 ...
La\_3 ...
Md\_3\_ext-4 ...
Oa\_3 ...
Ac\_3\_ext-4 ...
Pym\_3\_ext-4 ...
Cpb\_3 ...
Pa\_3\_ext4 ...
Xt\_3 ...
Xl\_3\_A ...
Xl\_3\_B ...
Lo\_3 ...
Lo\_3 ...
Lo\_3 ...
Dr\_3a ...
Pp\_3a\_ext-4 ...
Gmo\_3a\_ext-4 ...
Tr\_3a ...
Tr\_3a ...
Ga\_3a ...
O1\_3a ...
On\_3a ...
Xm\_3a ...
Dr\_3b ...
Omy\_3a/b\_ext4 ...
Omy\_3b\_ext4 ...
Gmo\_3b\_ext4 ...
Tr\_3b\_ext14 ...
Tr\_3b ...
O1\_3b ...
On\_3b ...
Hb\_3\_ext1 ...
Cm\_3\_ext4 ...
Exons ...
motifs ...
Leu zipper ...
Leu zipper

1010 1020 1030 1040 1050
Hs\_3 ...
Mm\_3 ...
Bt\_3 ...
La\_3 ...
Md\_3\_ext-4 ...
Oa\_3 ...
Ac\_3\_ext-4 ...
Pym\_3\_ext-4 ...
Cpb\_3 ...
Pa\_3\_ext4 ...
Xt\_3 ...
Xl\_3\_A ...
Xl\_3\_B ...
Lo\_3 ...
Lo\_3 ...
Lo\_3 ...
Dr\_3a ...
Pp\_3a\_ext-4 ...
Gmo\_3a\_ext-4 ...
Tr\_3a ...
Tr\_3a ...
Ga\_3a ...
O1\_3a ...
On\_3a ...
Xm\_3a ...
Dr\_3b ...
Omy\_3a/b\_ext4 ...
Omy\_3b\_ext4 ...
Gmo\_3b\_ext4 ...
Tr\_3b\_ext14 ...
Tr\_3b ...
O1\_3b ...
On\_3b ...
Hb\_3\_ext1 ...
Cm\_3\_ext4 ...
Exons ...
motifs ...
Leu zipper ...
Leu zipper





1010 1020 1030 1040 1050 1060 1070 1080 1090 1100 1110 1120 1130 1140 1150 1160 1170 1180 1190 1200  
Ac\_4  
Pym\_4\_ex2-4  
Cpb\_4  
Pa\_4  
Le\_4  
Lo\_4\_ex2-4  
Dr\_4  
Pp\_4  
Ot\_4\_ex4  
Gno\_4  
Tr\_4  
Tn\_4  
Ga\_4  
Ol\_4  
Pf\_4  
Dl\_4  
On\_4  
Sau\_4  
Xm\_4  
Lo\_4r  
Dr\_4r  
To\_4\_ex3-4  
Le\_4\_ex4  
Cm\_4\_ex4  
Exons  
motifs

1210 1220 1230 1240 1250 1260 1270 1280 1290 1300 1310 1320 1330 1340 1350 1360 1370 1380  
Ac\_4  
Pym\_4\_ex2-4  
Cpb\_4  
Pa\_4  
Le\_4  
Lo\_4\_ex2-4  
Dr\_4  
Pp\_4  
Ot\_4\_ex4  
Gno\_4  
Tr\_4  
Tn\_4  
Ga\_4  
Ol\_4  
Pf\_4  
Dl\_4  
On\_4  
Sau\_4  
Xm\_4  
Lo\_4r  
Dr\_4r  
To\_4\_ex3-4  
Le\_4\_ex4  
Cm\_4\_ex4  
Exons  
motifs
