# Supplementary material for: Dact genes are chordate specific regulators at the intersection of Wnt and Tgf-β signaling pathways
Source: PubMed Central journal article supplement (PMC4236578; doi:10.1186/1471-2148-14-157), 2014-08-06

## **Additional File 11. Gnathostome Dact sequence logos.**

Sequence logos of the four gnathostome Dact paralog group proteins, based on the gapped alignments shown as Additional File 10.

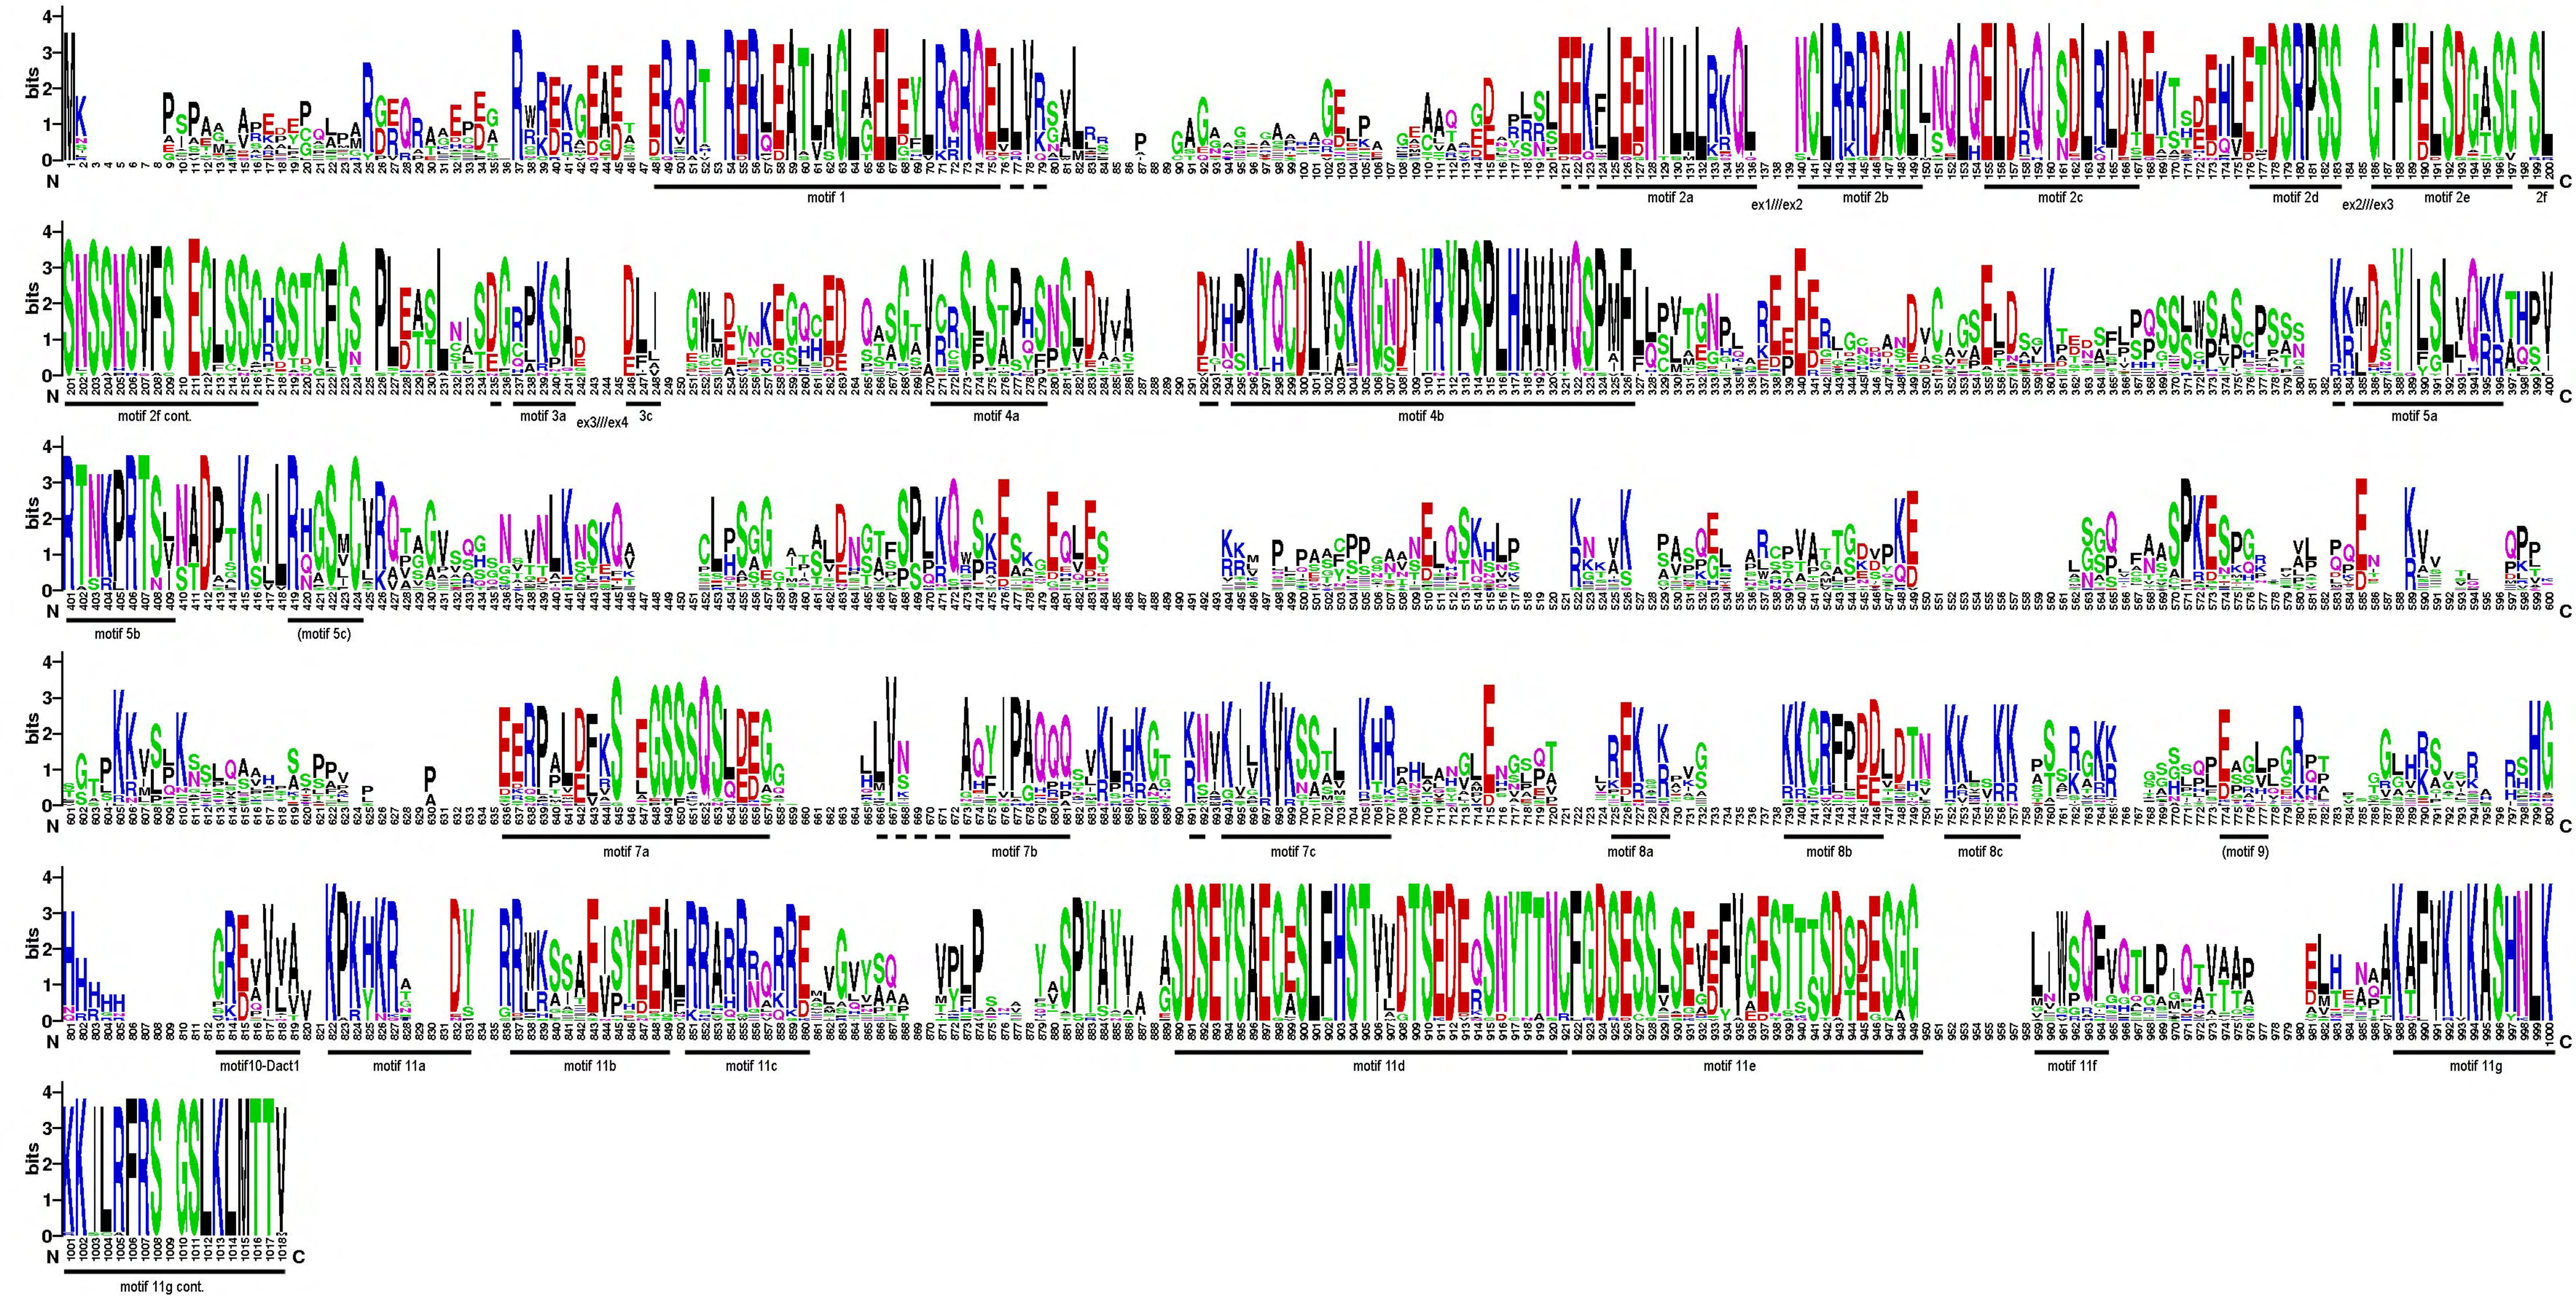

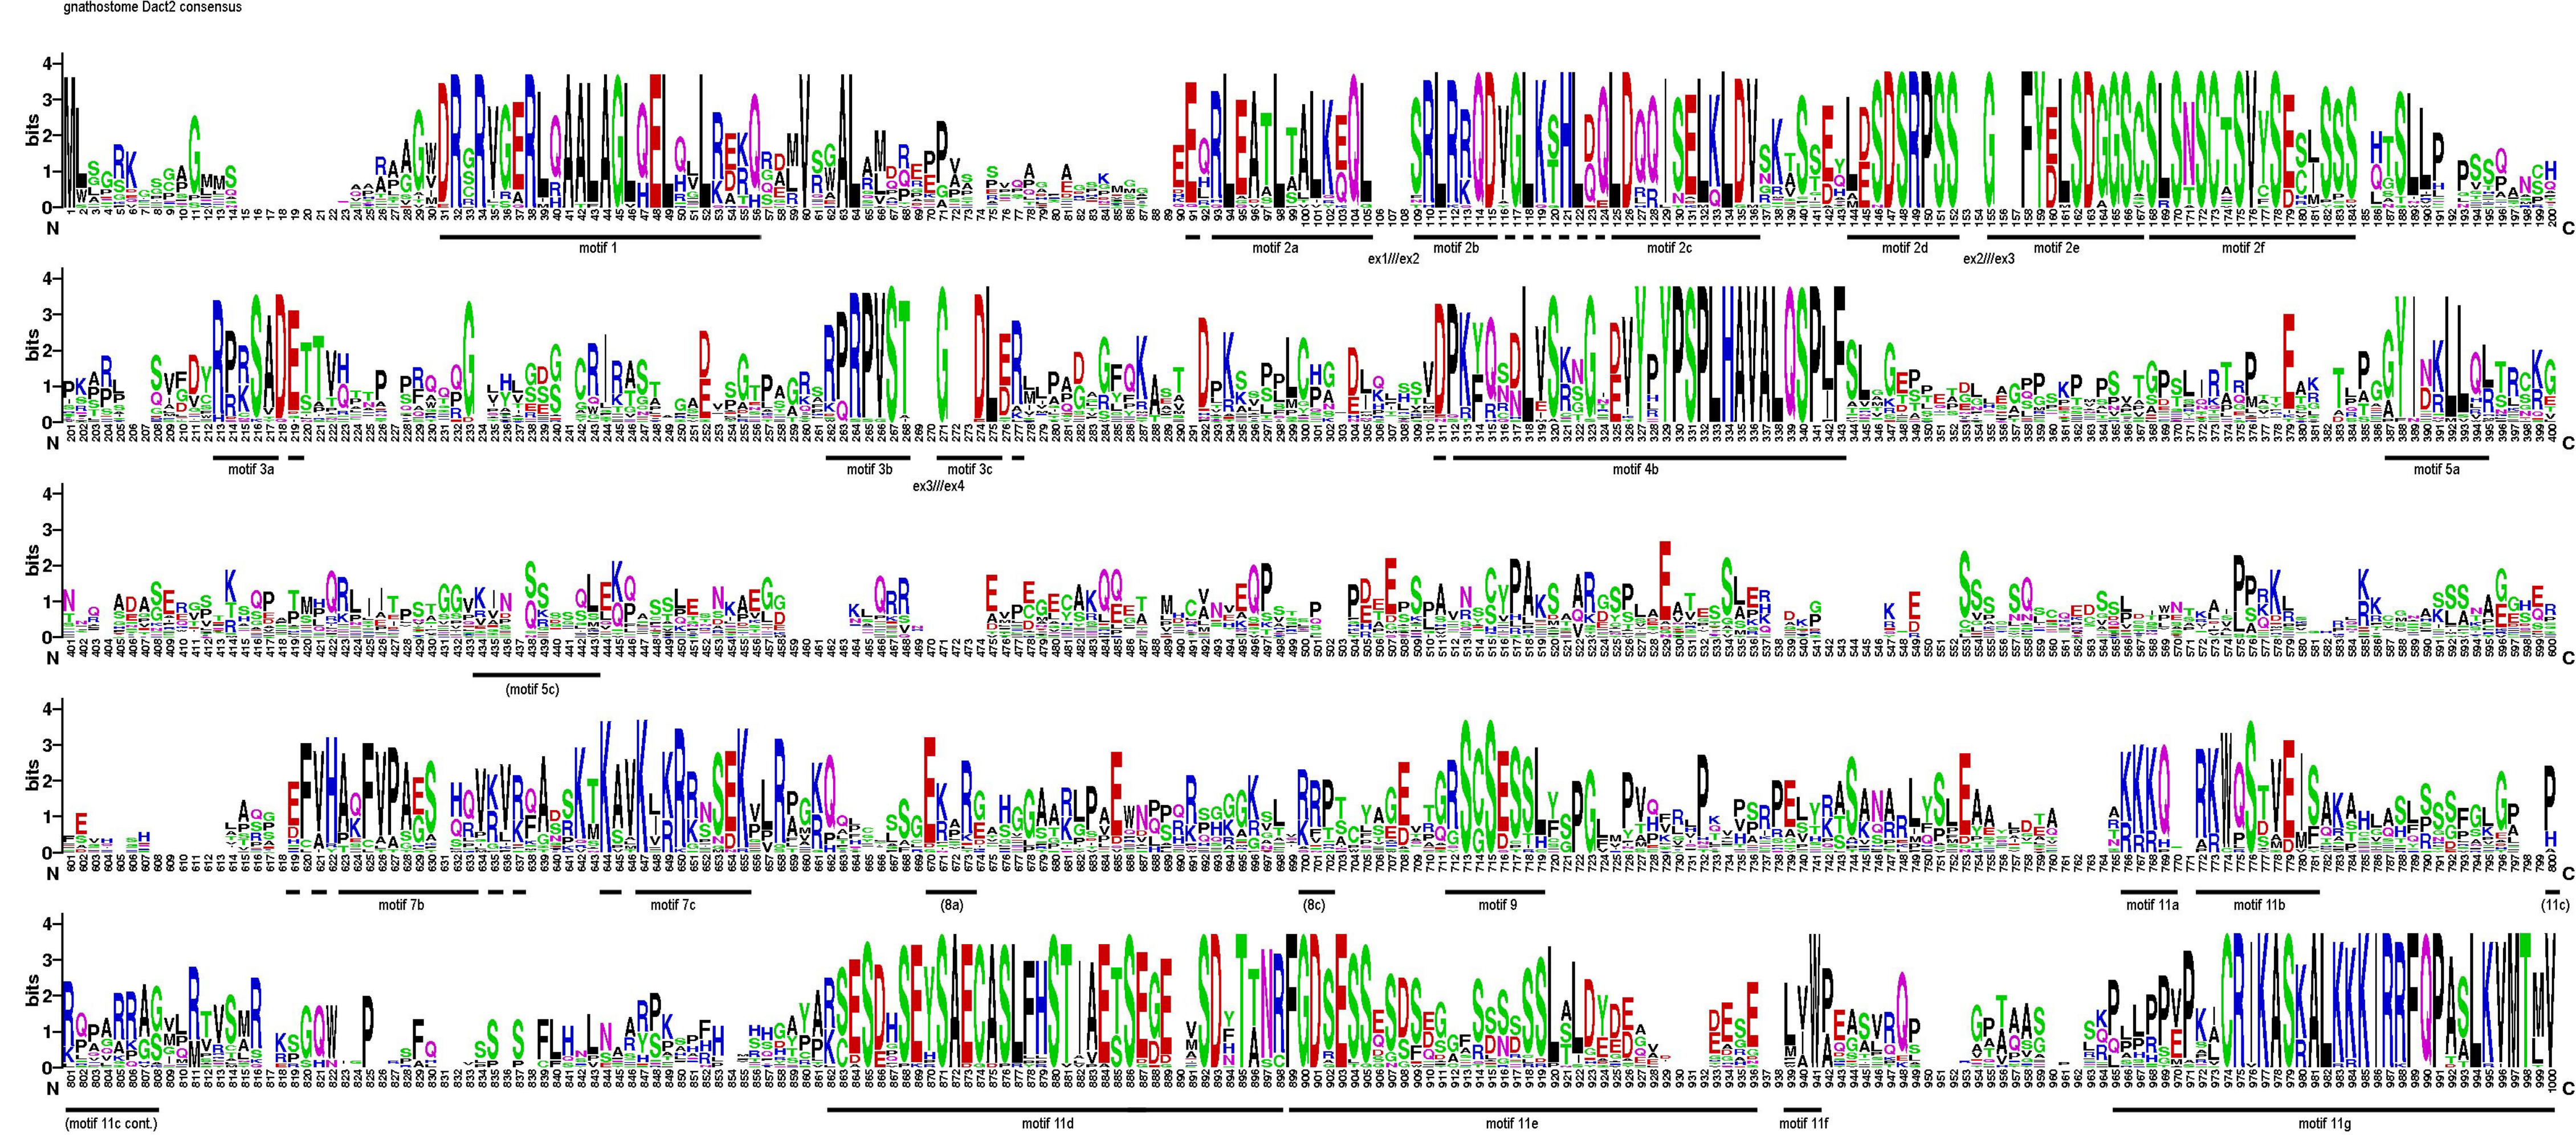

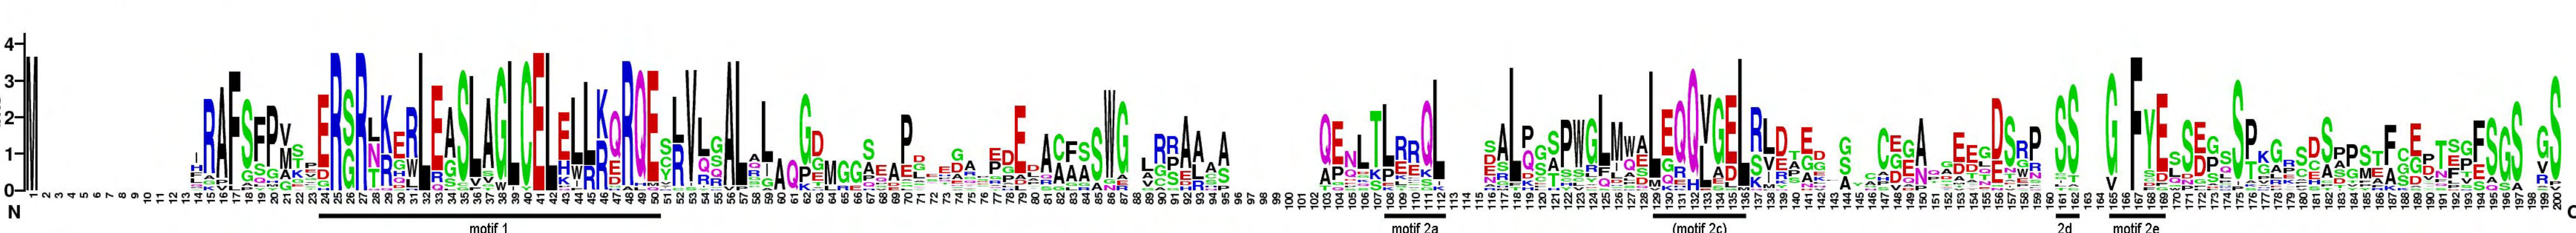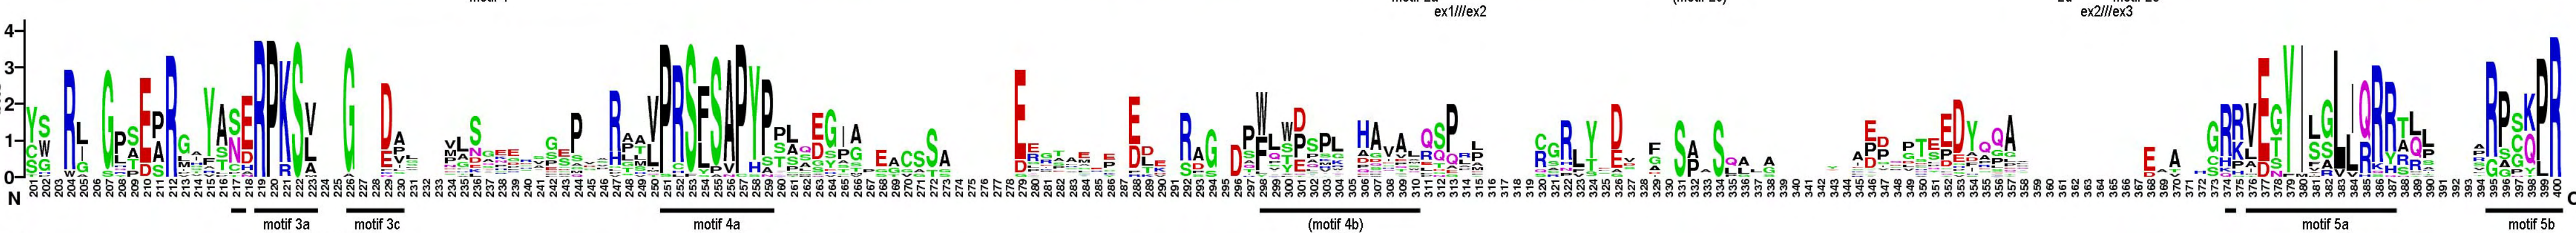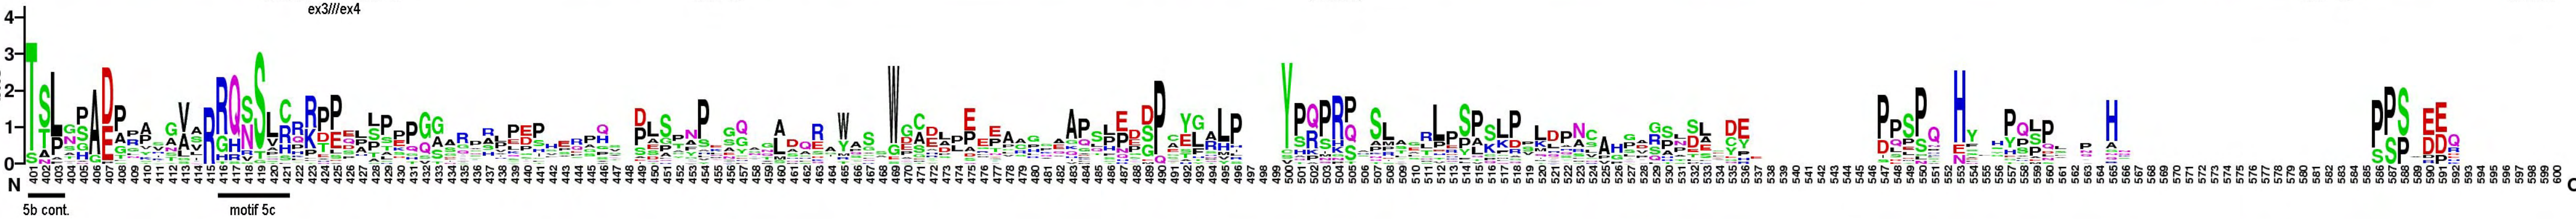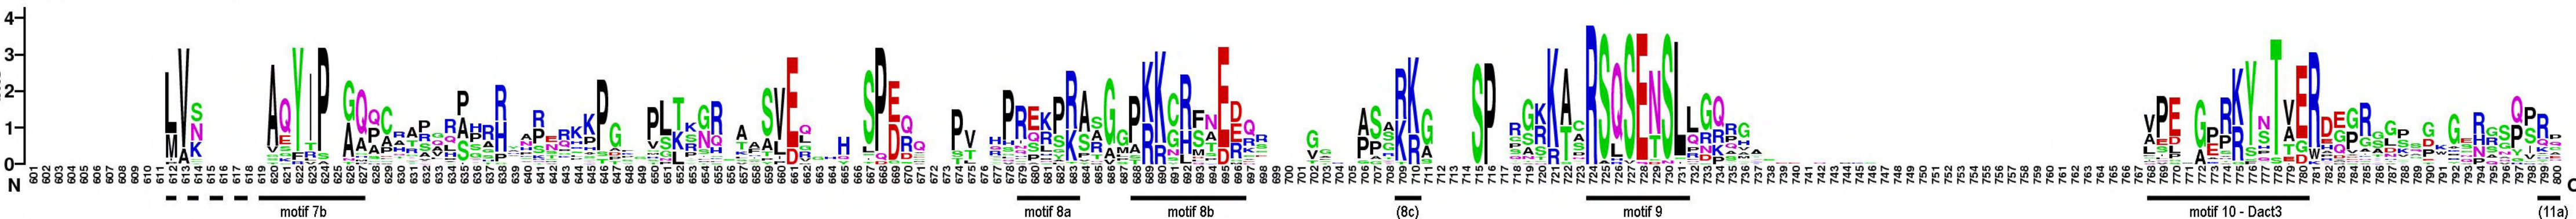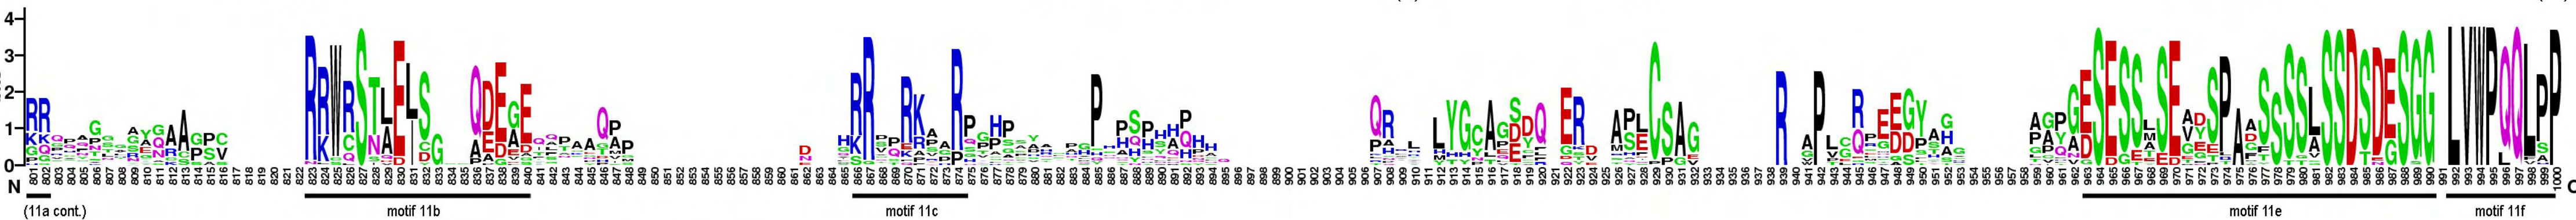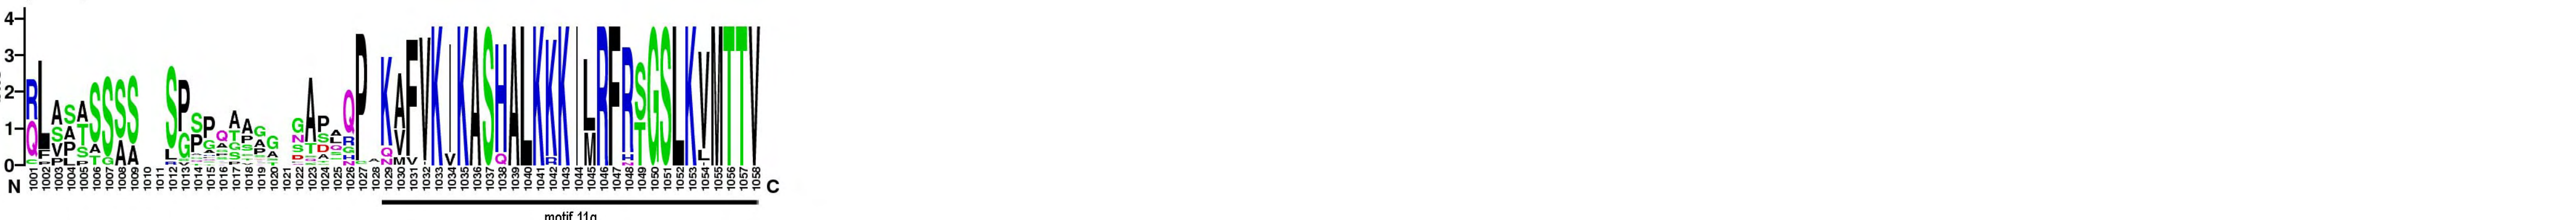

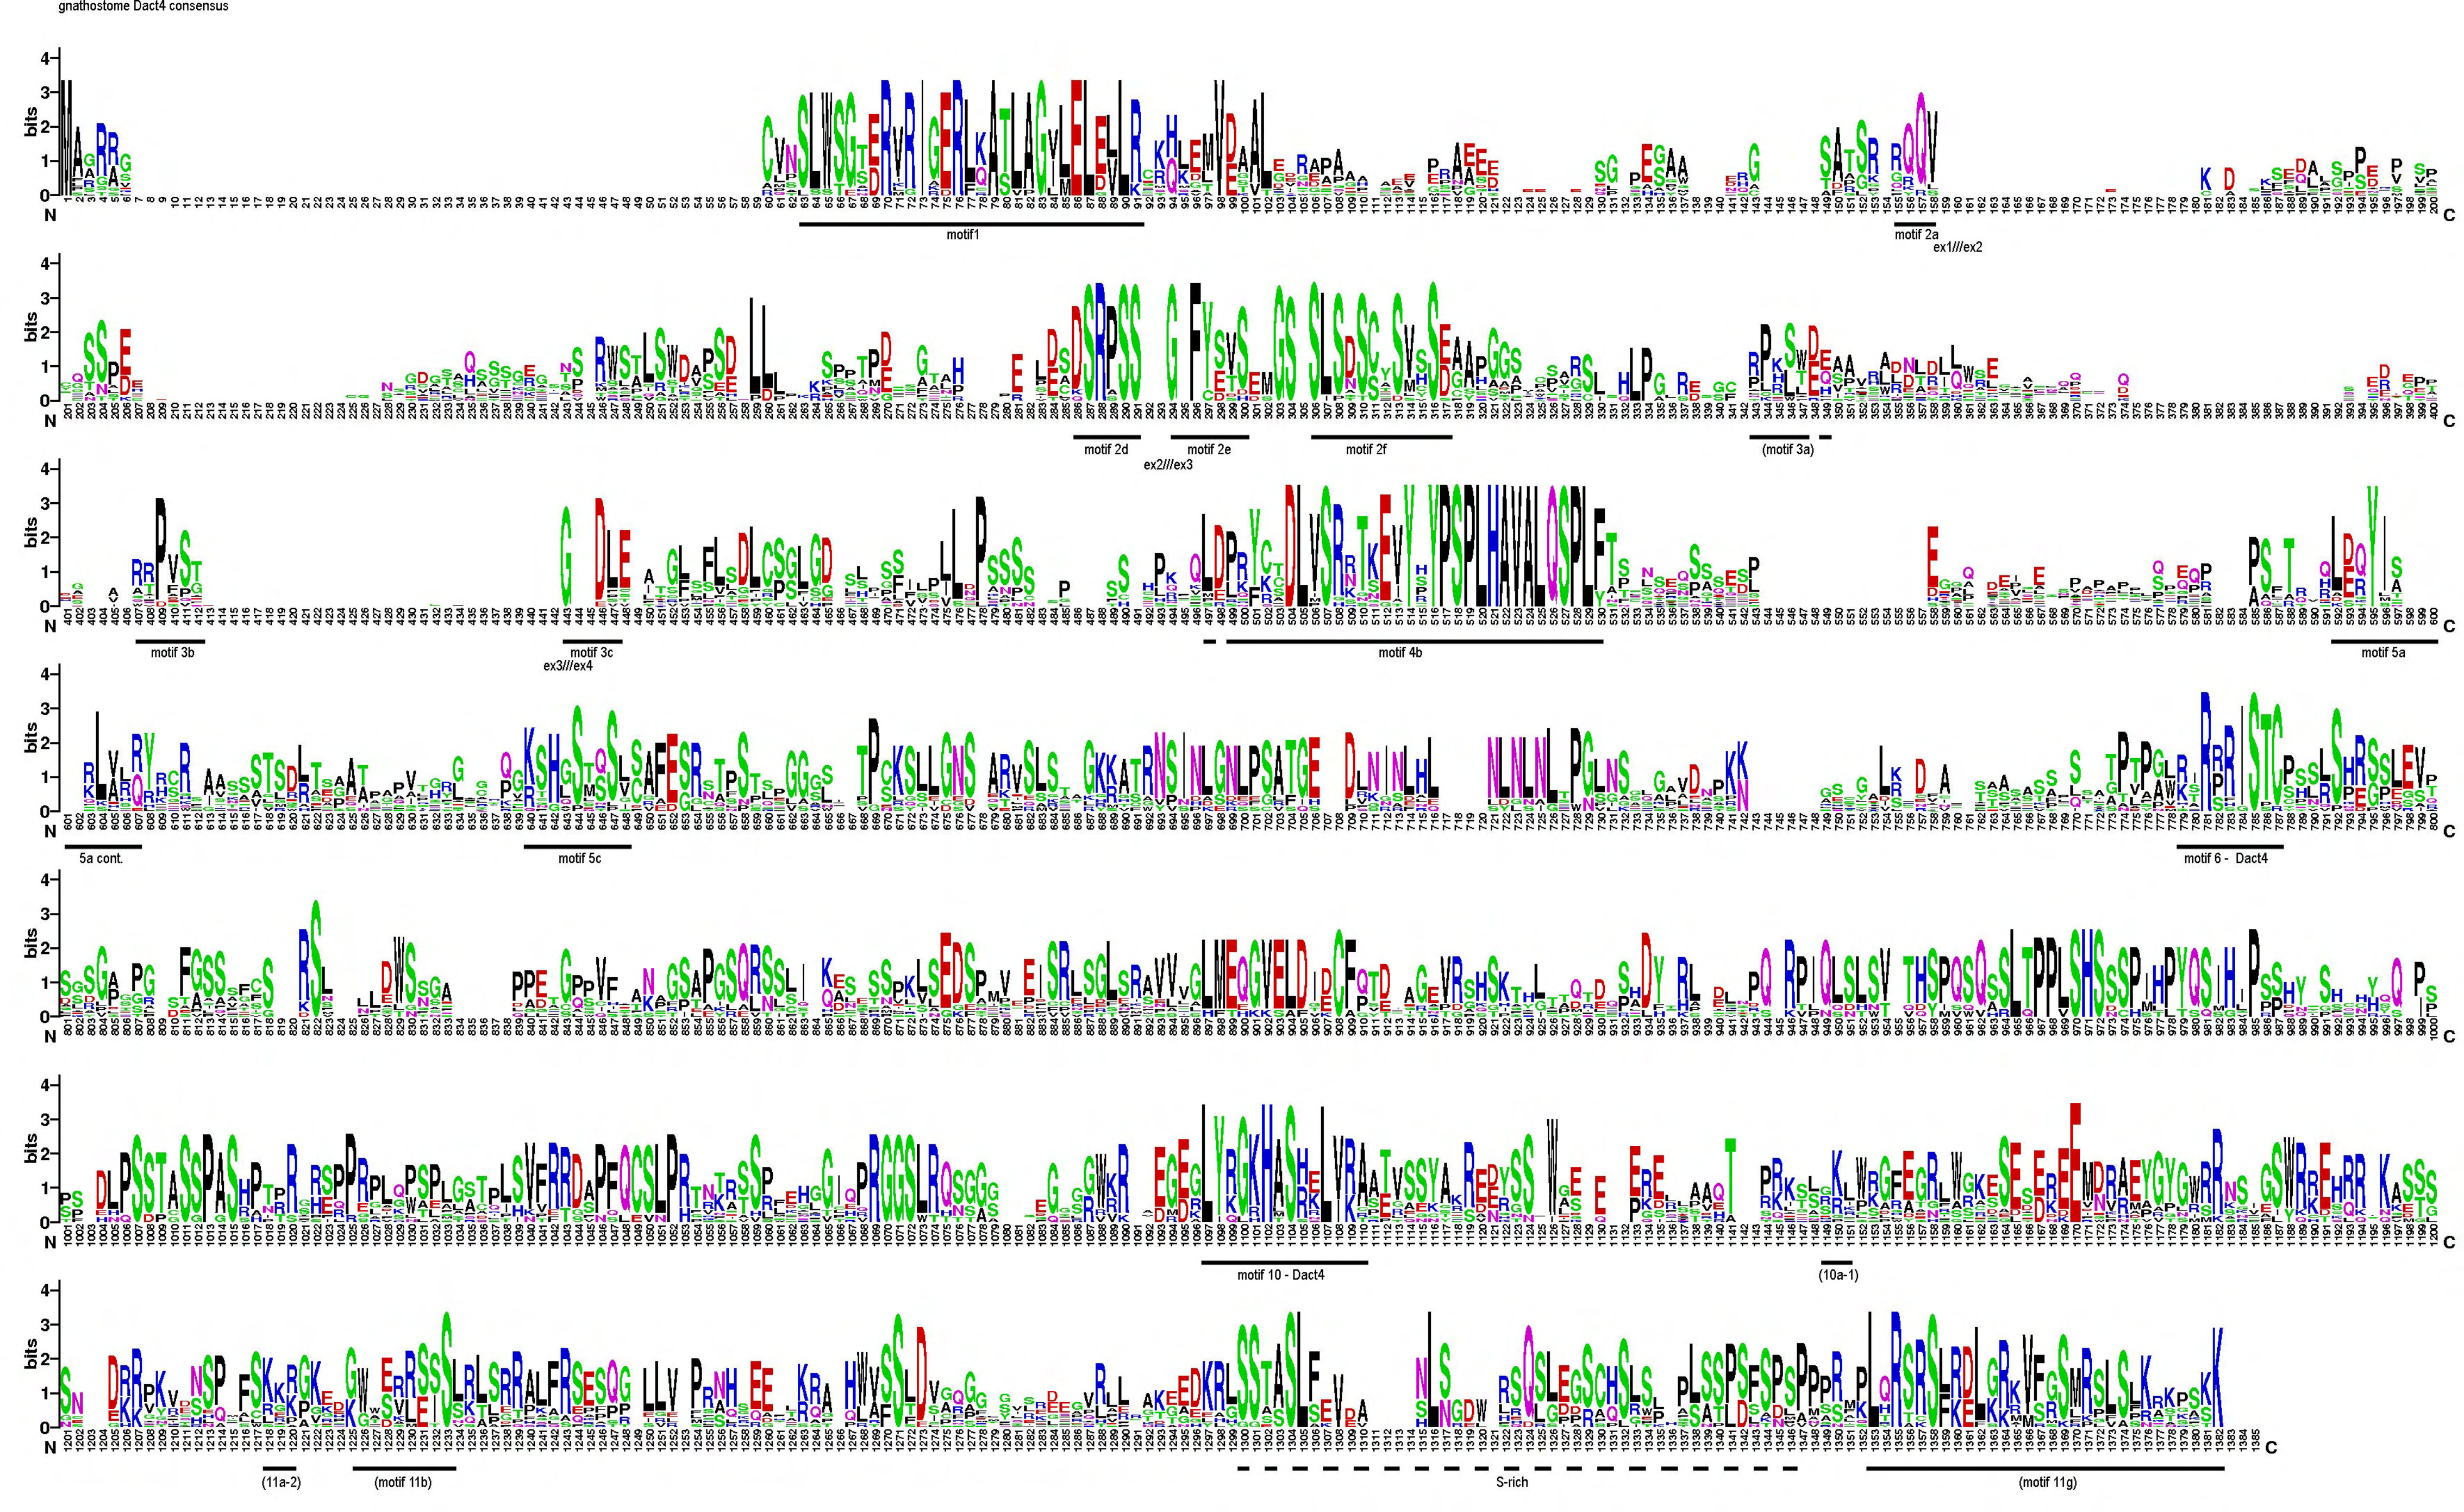

Supplement: 1471-2148-14-157-S11.pdf [file 1471-2148-14-157-S11.pdf]
