# Supplementary material for: Dact genes are chordate specific regulators at the intersection of Wnt and Tgf-β signaling pathways
Source: PubMed Central journal article supplement (PMC4236578; doi:10.1186/1471-2148-14-157), 2014-08-06
Supplement: 1471-2148-14-157-S12.pdf [file 1471-2148-14-157-S12.pdf]

## Additional File 12.

### Arrangement of the leucine zipper in gnathostome Dact1, 2 and 3, and in cyclostome and *Branchiostoma* dact proteins.

|                                                                                                                                                                                                                                                                                |                |            |
|--------------------------------------------------------------------------------------------------------------------------------------------------------------------------------------------------------------------------------------------------------------------------------|----------------|------------|
| L234567L234567L234567L234567L234567L234567L23                                                                                                                                                                                                                                  | L for L-zipper | gene       |
| LEENI <b>LLL</b> LRKQ <b>INCL</b> RRRDAG <b>LLNQ</b> LQ <b>ELDKQ</b> ISD <b>LR</b> LDVEKTS                                                                                                                                                                                     | 6              | Hs DACT1   |
| LEAALAA <b>LQEQ</b> LS <b>SR</b> LRQQD <b>IGL</b> K <b>THLDQ</b> L <b>DLQ</b> ISK <b>LQL</b> DVGTAS                                                                                                                                                                            | 6              | Hs DACT2   |
| L234567L234567L2...345...67L234567L234567L234567L234567L                                                                                                                                                                                                                       | L for L-zipper | gene       |
| (gap) LEE <b>Q</b> LEALP...GLV...WD <b>L</b> G <b>QQ</b> L <b>GD</b> LS <b>LE</b> SG <b>LE</b> QESGRSSG                                                                                                                                                                        | 5              | Hs DACT3   |
| PEE <b>Q</b> LDALP...GLM...WE <b>L</b> EQ <b>QL</b> <b>L</b> LL <b>RL</b> NPEKTPGEAAETD <b>SWPSS</b>                                                                                                                                                                           | 3              | Ac Dact3   |
| LQGG <b>ED</b> LD...R <b>QL</b> ...WE <b>L</b> ER <b>Q</b> L <b>GE</b> LL <b>RL</b> RAENDNEN                                                                                                                                                                                   | 3              | Cpb Dact3  |
| L234567L234567L234567L2...67L234567L234567L234567L234567L                                                                                                                                                                                                                      | L for L-zipper | gene       |
| GARHFTEEST <b>L</b> K <b>RQ</b> L <b>NG</b> LKSHY <b>L</b> GL <b>I</b> ...SQ <b>L</b> EQ <b>Q</b> V <b>GE</b> L <b>Q</b> LEREPAYGDIVET <b>L</b> DSQPSSG                                                                                                                        | 3+2            | Lc Dact3   |
| PVSRAGD <b>LL</b> LR <b>RQ</b> IN <b>SL</b> KGTPWALM...AS <b>L</b> EQ <b>Q</b> V <b>EL</b> RVDAETAYAEPPSDVGD <b>SRPSSG</b>                                                                                                                                                     | 3+2            | Lo dact3   |
| EQE <b>QL</b> LR <b>RQ</b> IN <b>RL</b> Q <b>GAP</b> S <b>LLM</b> ... <b>L</b> <b>L</b> Q <b>Q</b> L <b>SE</b> MRVDS <b>GL</b> ACEQ <b>NTEED</b> L <b>ES</b> PSGSSSG                                                                                                           | 3              | Dr dact3a  |
| QES <b>LT</b> LR <b>RQ</b> LRAL <b>Q</b> GS <b>PWGLM</b> ...Q <b>L</b> EQ <b>Q</b> V <b>GE</b> L <b>RL</b> DDAEGCGGAPGEPGDT <b>WPSSG</b>                                                                                                                                       | 3+2            | Tn dact3a  |
| QQN <b>LT</b> LR <b>RQ</b> LSAL <b>H</b> SS <b>PWGF</b> M...Q <b>L</b> ER <b>Q</b> V <b>GE</b> L <b>RI</b> DTDDGCCDGA <b>Q</b> GTGDS <b>RPSSG</b>                                                                                                                              | 2+2            | Ol dact3a  |
| QEN <b>LT</b> LR <b>RQ</b> LSAL <b>Q</b> SS <b>PWGLM</b> ...Q <b>L</b> EQ <b>Q</b> V <b>GE</b> L <b>RI</b> DAADDCCDGA <b>Q</b> ETGNS <b>RPSSG</b>                                                                                                                              | 3+2            | On dact3a  |
| EQQSPRGTPESCWS <b>LM</b> ...K <b>LL</b> QH <b>Q</b> V <b>GE</b> L <b>K</b> VDTENSSAAAVENCTEDGERAGAG                                                                                                                                                                            | 2              | Dr dact3b  |
| RSAL <b>V</b> SL <b>A</b> HL <b>Q</b> CASWYFD...PAMK <b>Q</b> Q <b>V</b> A <b>E</b> LS <b>L</b> K <b>T</b> EDHST                                                                                                                                                               | -              | Tn dact3b  |
| RQIS <b>R</b> F <b>Q</b> LS <b>H</b> VDSR...SS <b>L</b> EE <b>H</b> V <b>A</b> EL <b>K</b> IK <b>T</b> EVK <b>S</b> VNSD <b>E</b> ED <b>R</b> PL <b>T</b> S                                                                                                                    | 2              | Ol dact3b  |
| DAPNGKESY <b>G</b> LS <b>S</b> L <b>Q</b> FT <b>P</b> W <b>L</b> S...AS <b>L</b> EE <b>Q</b> V <b>A</b> EL <b>K</b> V <b>D</b> CEV <b>K</b> SSD <b>S</b> T <b>N</b> L <b>D</b> AS <b>Q</b> V <b>I</b> S <b>G</b>                                                               | 2+2            | On dact3b  |
| L234567L234567L23L234567L234567L234567L234567L34567L                                                                                                                                                                                                                           | L for L-zipper | gene       |
| LGG <b>R</b> D <b>W</b> LY <b>ALL</b> V <b>GP</b> HLAR <b>Q</b> HDPACG <b>T</b> AGSV <b>QL</b> LE <b>Q</b> R <b>F</b> CE <b>L</b> GR <b>GE</b> GGPPAAAG                                                                                                                        | 2              | Lj dactA   |
| L <b>ER</b> DFVES <b>L</b> RAM <b>KE</b> Q <b>IG</b> CL <b>P</b> QR <b>D</b> L <b>G</b> LL <b>S</b> RL <b>R</b> HL <b>N</b> EQ <b>F</b> SE <b>L</b> K <b>M</b> DM <b>D</b> R <b>A</b> A                                                                                        | 2+4            | Lj dactB   |
| Q <b>CG</b> L <b>G</b> K <b>P</b> CA <b>L</b> ER <b>PL</b> SE <b>L</b> RV <b>DT</b> D <b>GT</b>                                                                                                                                                                                | ?+2            | Lj dactC   |
| A <b>LL</b> AVGRD <b>LE</b> L <b>I</b> KE <b>Q</b>                                                                                                                                                                                                                             | 3+?            | Lj dactC/D |
| L234567L234567L234567L234567L234567L234567L234567L234567L                                                                                                                                                                                                                      | L for L-zipper | gene       |
| P <b>GC</b> IN <b>S</b> S <b>I</b> DK <b>L</b> RNA <b>V</b> D <b>HL</b> K <b>R</b> TDS <b>D</b> L <b>V</b> GA <b>L</b> H <b>T</b> L <b>N</b> T <b>Q</b> I <b>L</b> Q <b>L</b> K <b>L</b> AEAA <b>E</b> T <b>D</b> GEN <b>D</b> L <b>M</b> SAS <b>C</b> RS <b>M</b> SS <b>S</b> | 5              | Bf1 dact   |
| exon1-encoded                                                                                                                                                                                                                                                                  | exon2-encoded  |            |

Amino acids are displayed using the 1-letter code. A template with L correctly placed for a L-zipper is shown above each set of sequences. Abbreviations: see Additional File 1.

**Green** highlighter, end of exon 1 - encoded sequences

orange **L**, L encoded by 1st exon

red **L**, L encoded by 2nd exon

L contributing to a continuous or 1st part of a bipartite L zipper are highlighted in **blue**, L contributing to the 2nd part of a L zipper are highlighted in **pink**.

In gnathostome Dact1 and Dact2 proteins, the exon1-2 splice generates a continuous 6x leucine (L-) zipper (top).

In coelacanth (Lc) and actinopterygian dact3 proteins, 3 amino acids having been lost, leading to a bipartite motif. In most teleost dact3b sequences, conversion of L into other amino acids further reduced the L-zipper. In tetrapod Dact3 proteins, additional four amino acids have been shed, restoring a reduced but continuous L-zipper.

In cyclostomes, dact A carries a small, exon 2 encoded L-zipper, and dact B a bipartite L-zipper. For dact C and D, exon 1 cannot currently be allocated, hence the state of the L-zipper is unclear.

In Branchiostoma dact, a continuous 5L zipper is found.
