# Supplementary material for: Dact genes are chordate specific regulators at the intersection of Wnt and Tgf-β signaling pathways
Source: PubMed Central journal article supplement (PMC4236578; doi:10.1186/1471-2148-14-157), 2014-08-06
Supplement: 1471-2148-14-157-S14.pdf [file 1471-2148-14-157-S14.pdf]

## **Additional File 14. Trimmed alignment of Dact protein sequences.**

Alignment of protein sequences for all Dact genes used in the phylogenetic analysis after removal of poorly aligned columns. This alignment was used for the reconstruction of the phylogenetic trees. Gaps are indicated by '-', missing sequences by 'X'.
